# Supplementary material
Source: publisher figshare collection journal article supplement (https://gsapubs.figshare.com/ndownloader/files/28102623)
Supplement: Supplementary file 1 [file 28102623]

## Sheet: G48867
Zhang, H., et al., 2021, Spatially variable provenance of the Chinese Loess Plateau: Geology, v. 49, https://doi.org/10.1130/G48867.1

## Sheet: LD0
	207Pb/206Pb	1s	207Pb/235U	1s	206Pb/238U	1s
LD0-001	860	145	661	44	606	15
LD0-002	756	65	657	21	630	10
LD0-003	-207	1176	458	564	791	65
LD0-004	299	63	414	14	436	6
LD0-005	966	52	938	23	928	13
LD0-006	545	86	398	18	374	6
LD0-007	1776	38	1698	27	1640	22
LD0-008	2110	34	2108	28	2112	27
LD0-009	1779	34	1711	25	1660	21
LD0-010	902	54	921	23	932	13
LD0-011	398	153	442	30	452	9
LD0-012	501	486	257	65	231	9
LD0-013	267	156	457	32	497	10
LD0-014	2396	30	2404	26	2420	28
LD0-015	612	81	712	26	746	12
LD0-016	512	310	246	29	219	6
LD0-017	2143	31	2195	26	2255	26
LD0-018	566	68	502	17	490	7
LD0-019	802	44	767	17	758	10
LD0-020	1197	96	856	38	732	15
LD0-021	452	90	421	13	415	6
LD0-022	388	67	457	15	472	7
LD0-023	562	59	536	16	532	8
LD0-024	585	56	531	16	519	7
LD0-025	266	108	124	7	117	2
LD0-026	705	151	393	22	342	6
LD0-027	2248	32	1867	25	1548	19
LD0-028	1121	90	1004	26	951	13
LD0-029	1498	44	1488	28	1484	20
LD0-030	683	135	550	35	520	12
LD0-031	198	127	202	10	202	3
LD0-032	350	114	263	15	254	5
LD0-033	890	73	976	31	1016	16
LD0-034	433	92	431	19	431	7
LD0-035	683	205	391	38	344	9
LD0-036	4	310	247	45	274	8
LD0-037	268	125	20	1	18.3	0.3
LD0-038	373	64	266	9	254	4
LD0-039	1062	55	809	22	722	11
LD0-040	1738	42	1807	30	1871	24
LD0-041	423	146	310	22	296	6
LD0-042	-82	547	13	6	17.3	0.7
LD0-043	231	193	243	22	245	5
LD0-044	995	78	897	31	859	14
LD0-045	992	61	992	27	993	15
LD0-046	363	87	437	18	452	7
LD0-047	959	56	767	21	704	10
LD0-048	395	95	434	20	443	7
LD0-049	430	90	454	20	459	8
LD0-050	2022	41	2025	31	2032	26
LD0-051	1170	49	1126	25	1106	15
LD0-052	1228	82	1169	26	1137	15
LD0-053	678	78	490	19	451	7
LD0-054	1861	48	1881	34	1902	27
LD0-055	1842	44	1803	30	1772	23
LD0-056	356	132	239	16	228	5
LD0-057	699	138	318	22	269	6
LD0-058	1870	41	1860	29	1853	23
LD0-059	386	117	467	25	484	9
LD0-060	1855	42	1731	29	1633	20
LD0-061	985	57	854	23	806	11
LD0-062	678	79	528	21	495	8
LD0-063	375	114	467	24	486	8
LD0-064	1098	137	234	13	157	3
LD0-065	285	90	236	11	232	4
LD0-066	1036	56	1027	26	1025	14
LD0-067	589	75	306	12	270	4
LD0-068	2118	49	2138	37	2162	31
LD0-069	538	85	475	20	463	7
LD0-070	1641	51	1204	28	978	14
LD0-071	1156	163	1173	54	1181	21
LD0-072		148	138	8	146	2
LD0-073	1196	58	983	26	892	13
LD0-074	567	108	347	19	315	6
LD0-075	466	60	406	13	396	6
LD0-076	573	91	500	22	485	8
LD0-077	242	161	193	12	189	3
LD0-078	836	160	495	37	426	10
LD0-079	1035	68	861	27	796	12
LD0-080	364	129	448	26	466	9
LD0-081	363	188	289	25	280	6
LD0-082	2636	47	2279	38	1905	27
LD0-083	563	164	131	11	109	2
LD0-084	649	138	470	23	435	7
LD0-085	2754	47	2647	40	2514	36
LD0-086	880	117	779	39	745	14
LD0-087	-138	263	94	17	105	3
LD0-088	731	75	623	23	595	9
LD0-089	961	138	799	35	742	13
LD0-090	1911	52	1906	36	1905	25
LD0-091	649	132	718	40	741	15
LD0-092	1536	102	1497	40	1470	21
LD0-093	204	112	76	5	73	1
LD0-094	465	423	311	54	291	9
LD0-095	2325	51	2175	37	2023	26
LD0-096	1941	54	1707	35	1527	21
LD0-097	361	100	79	4	70	1
LD0-098	370	132	369	23	370	7
LD0-099	354	89	452	19	472	7
LD0-100	484	107	262	15	238	4
LD0-101	507	122	434	25	421	8
LD0-102	1824	60	1347	34	1071	16
LD0-103	1442	66	1320	35	1249	19
LD0-104	1561	64	1418	36	1328	20
LD0-105	662	77	657	24	658	10
LD0-106	894	82	790	29	756	12
LD0-107	1031	69	957	29	928	14
LD0-108	366	87	407	17	416	7
LD0-109	2356	91	2200	44	2036	28
LD0-110	909	85	888	33	882	14
LD0-111	576	124	463	27	442	8
LD0-112	1001	92	896	36	857	15
LD0-113	594	142	483	32	462	10
LD0-114	639	373	296	42	255	7
LD0-115	1611	72	1082	35	842	14
LD0-116	2409	59	2253	44	2090	30
LD0-117	964	79	879	31	848	13
LD0-118	795	91	530	24	472	8
LD0-119	777	114	282	17	227	5
LD0-120	1907	64	1860	42	1823	26
LD0-121	430	223	418	42	417	11
LD0-122	370	171	411	31	420	9
LD0-123	1081	149	587	42	470	12
LD0-124	2433	90	2299	44	2151	31
LD0-125	737	288	327	44	273	9
LD0-126	1574	108	1256	38	1078	17
LD0-127	1829	75	1664	47	1542	26
LD0-128	63	159	242	19	262	5
LD0-129	717	75	797	27	828	12
LD0-130	358	65	433	14	449	6
LD0-131	426	74	256	10	238	3
LD0-132	1450	53	1412	31	1391	20
LD0-133	414	106	449	22	457	8
LD0-134	863	66	839	25	832	12
LD0-135	953	53	942	23	940	12
LD0-136	668	97	466	22	428	7
LD0-137	2063	67	2000	30	1940	24
LD0-138	803	76	699	25	669	10
LD0-139	1425	46	1374	27	1344	17
LD0-140	-14	219	237	28	264	7
LD0-141	314	180	439	35	465	10
LD0-142	1447	53	1372	30	1328	18
LD0-143	2397	37	1951	29	1563	20
LD0-144	1562	132	1555	52	1550	28
LD0-145	430	100	310	16	295	5
LD0-146	622	70	669	22	684	10
LD0-147	1393	57	1367	32	1353	19
LD0-148	-5	309	218	40	240	7
LD0-149	405	361	337	48	328	11
LD0-150	329	182	261	23	254	5
LD0-151	787	92	771	31	767	13
LD0-152	699	158	356	28	306	7
LD0-153	419	102	434	21	438	7
LD0-154	811	75	908	29	950	14
LD0-155	493	102	311	16	287	5
LD0-156	1666	96	1503	37	1390	21
LD0-157	393	141	430	27	438	8
LD0-158	1852	47	1841	32	1836	24
LD0-159	412	155	466	32	478	10
LD0-160	2468	51	2519	43	2587	42
LD0-161	682	203	273	28	228	7
LD0-162	963	67	904	27	882	13
LD0-163	981	61	944	26	930	13
LD0-164	349	285	74	11	66	2
LD0-166	2694	40	2745	34	2821	34
LD0-167	515	81	442	18	429	7
LD0-168	855	89	951	35	996	17
LD0-169	1470	56	1516	33	1552	21
LD0-170	901	278	397	41	316	7
LD0-171	716	115	546	30	507	10
LD0-172	395	136	245	17	230	5
LD0-173	2489	42	2455	34	2419	29
LD0-174	364	107	489	24	517	9
LD0-175	95	152	237	18	252	5
LD0-176	543	104	454	23	438	7
LD0-177	2090	200	1784	90	1535	27
LD0-178	965	84	1017	35	1043	17
LD0-179	526	87	461	20	449	7
LD0-180	2135	52	2129	38	2126	30
LD0-181	1544	226	1433	87	1359	26
LD0-182	-13	180	366	32	436	9
LD0-183	118	198	217	21	226	5
LD0-184	969	79	948	32	942	15
LD0-185	799	341	347	44	284	7
LD0-186	747	137	554	35	509	11
LD0-187	491	72	384	14	367	5
LD0-188	673	156	484	35	446	10
LD0-189	1292	73	1080	34	981	16
LD0-190	1365	65	1309	34	1277	18
LD0-191	731	85	718	28	715	11
LD0-192	54	230	321	37	359	9
LD0-193	226	326	416	64	452	14
LD0-194	1281	106	489	28	338	7
LD0-195	315	172	464	35	495	10
LD0-196	585	199	967	69	1146	27
LD0-197	676	221	427	44	383	11
LD0-198	166	337	250	40	260	8
LD0-199	2267	55	2202	41	2136	30
LD0-200	47	215	453	44	538	13
LD0-201	817	99	809	35	807	14
LD0-202	633	97	635	28	636	11
LD0-203	2526	54	2456	42	2377	32
LD0-204	645	118	513	28	485	9
LD0-205	1981	71	2059	50	2141	37
LD0-206	2448	56	2429	43	2408	33
LD0-207	108	284	99	16	99	3
LD0-208	932	265	390	39	305	7
LD0-209	26	577	34	12	34	1
LD0-210	2188	137	1997	96	1820	62
LD0-211	98	155	298	23	325	7
LD0-212	-231	577	165	73	260	10
LD0-213	96	381	230	52	243	8
LD0-214	1418	84	1385	45	1366	24
LD0-215	1206	94	1149	43	1120	20
LD0-216	551	115	522	28	516	9
LD0-217	622	102	296	16	256	4
LD0-218	985	151	886	41	847	14
LD0-219	594	123	456	27	429	8
LD0-220	664	112	500	27	466	9
LD0-221	1357	93	1280	47	1237	23
LD0-222	1539	191	1496	75	1466	28
LD0-223	2624	63	2549	49	2458	38
LD0-224	484	186	400	34	387	9
LD0-225	1500	82	1432	45	1388	23
LD0-226	293	218	398	39	417	10
LD0-227	316	103	288	15	284	5
LD0-228	259	115	322	18	331	6
LD0-229	1881	73	1622	44	1431	22
LD0-230	1490	82	1405	44	1350	22
LD0-231	2221	69	1982	47	1763	26
LD0-232	2705	66	2702	51	2701	39
LD0-233	537	112	497	26	489	9
LD0-234	512	155	322	24	297	6
LD0-235	2339	105	2071	50	1813	28
LD0-236	1996	113	2072	77	2151	55
LD0-237	28	283	230	37	250	7
LD0-238	364	174	385	31	388	9
LD0-239	261	260	286	28	289	6
LD0-240	1421	100	1396	52	1381	26
LD0-241	451	130	408	25	401	8
LD0-242	978	100	969	40	967	17
LD0-243	1694	106	333	21	173	4
LD0-244	1093	155	923	44	854	16
LD0-245	-197	331	171	47	263	8
LD0-246	362	245	238	28	226	6
LD0-247	351	127	403	24	412	8
LD0-248	342	158	434	31	452	10
LD0-249	700	186	504	33	462	9
LD0-250	872	129	555	34	482	10
LD0-251	741	195	501	34	450	9
LD0-252	1519	137	1373	51	1282	22
LD0-253	694	118	493	28	451	9
LD0-254	463	175	287	24	266	6
LD0-255	687	240	390	43	342	10
LD0-256	574	134	542	33	534	11
LD0-257	947	137	812	48	770	18
LD0-258	530	116	457	25	447	9
LD0-259	749	73	906	29	979	15
LD0-260	61	124	213	14	229	5
LD0-261	158	142	279	20	296	6
LD0-262	763	84	511	22	460	8
LD0-263	392	122	398	23	401	8
LD0-264	1198	65	1314	34	1395	21
LD0-265	-694	745	166	114	381	14
LD0-266	479	132	502	31	510	11
LD0-267	570	245	139	18	116	4
LD0-268	105	203	230	24	243	6
LD0-269	2232	54	2023	39	1833	27
LD0-270	1972	53	1984	37	2003	27
LD0-271	2068	63	2158	46	2261	38
LD0-272	-73	190	378	41	465	14
LD0-273	1431	97	1218	49	1105	23
LD0-274	33	182	241	23	263	7
LD0-275	831	96	952	38	1008	18
LD0-276	664	238	471	49	434	12
LD0-277	1394	71	1319	38	1276	20
LD0-278	1772	66	1717	41	1676	26
LD0-279	1083	90	1079	40	1079	19
LD0-280	1161	76	1182	37	1195	19
LD0-281	453	152	547	37	570	13
LD0-282	324	128	452	26	478	9
LD0-283	478	172	254	22	231	6
LD0-285	2101	66	2035	45	1973	29
LD0-286	783	194	444	41	382	11
LD0-287	102	149	252	19	269	6
LD0-288	-317	408	261	87	453	16
LD0-289	1448	150	1207	52	1076	21
LD0-290	1780	82	1781	51	1782	31
LD0-291	118	173	265	23	282	7
LD0-292	559	130	438	27	415	8
LD0-293	475	212	227	24	204	6
LD0-294	2112	81	2024	55	1940	34
LD0-295	1064	135	960	54	916	21
LD0-296	2157	78	2050	53	1945	32
LD0-297	597	148	458	32	431	10
LD0-298	570	134	444	28	420	9
LD0-299	516	124	483	28	476	9
LD0-300	2017	135	1731	59	1504	27
LD0-301	486	134	468	29	464	9
LD0-302	619	206	261	27	223	6
LD0-303	1797	96	1737	58	1688	31
LD0-304	-121	288	29	6	31	1
LD0-305	-435	385	105	28	134	4
LD0-306	1146	115	949	46	866	17
LD0-307	4267	585	5300	741	8293	3040
LD0-308	950	142	420	30	331	7
LD0-309	-324	596	81	34	98	5
LD0-310	330	292	236	33	227	7
LD0-311	946	225	752	71	689	21
LD0-312	438	167	414	32	410	9
LD0-313	1886	109	1786	65	1704	32
LD0-314	358	165	124	11	112	3
LD0-315	818	149	717	46	686	15
LD0-316	1700	118	1345	61	1135	23
LD0-317	1986	123	1698	74	1477	35
LD0-318	1485	128	1050	56	855	18
LD0-319	554	150	476	33	461	10
LD0-320	2013	116	1619	67	1336	27
LD0-321	1584	190	1160	91	949	35
LD0-322	1814	129	1583	72	1420	30
LD0-323	654	186	459	39	422	11
LD0-324	2689	114	2585	81	2460	46
LD0-325	660	211	618	56	609	17
LD0-326	920	240	349	42	270	10
LD0-327	936	170	517	42	429	11
LD0-328	1320	146	722	48	547	12
LD0-330	901	206	634	57	565	15
LD0-331	883	204	553	52	479	14
LD0-332	1089	173	847	61	762	19
LD0-333	540	221	318	34	290	8
LD0-334	789	181	556	45	504	12
LD0-335	713	230	331	37	281	8
LD0-336	2500	135	2311	91	2116	45

## Sheet: LD1
	207Pb/206Pb	1s	207Pb/235U	1s	206Pb/238U	1s
LD1-001	2304	66	2347	50	2355	39
LD1-002	873	92	837	35	809	16
LD1-003	489	370	258	38	233	7
LD1-004	1331	87	1334	46	1316	26
LD1-005	624	139	463	31	425	10
LD1-006	861	123	868	46	859	19
LD1-007	1045	98	1126	45	1156	23
LD1-008	430	119	436	25	432	9
LD1-009	2475	75	2308	55	2122	37
LD1-010	1052	152	798	54	711	20
LD1-011	1884	85	1717	53	1588	29
LD1-012	2241	80	1999	55	1782	31
LD1-013	603	213	289	30	254	7
LD1-014	752	160	441	34	388	10
LD1-015	1653	103	1297	54	1106	24
LD1-016	1240	183	380	38	259	9
LD1-017	571	179	224	21	198	5
LD1-018	2101	103	1848	66	1681	35
LD1-019	2092	102	1590	62	1281	27
LD1-020	1335	180	502	47	353	12
LD1-021	874	208	310	33	250	7
LD1-022	531	354	240	40	221	7
LD1-023	1282	144	720	49	581	14
LD1-024	1058	220	359	41	275	10
LD1-025	1166	172	525	45	419	12
LD1-026	1915	146	1356	78	1112	31
LD1-027	2213	142	1638	88	1320	39
LD1-028	1092	344	350	60	271	13
LD1-029	2950	130	2541	103	2231	72
LD1-030	1000	182	510	45	448	13
LD1-031	2414	140	2094	95	1950	54
LD1-032	1491	195	940	79	799	26
LD1-033	1885	168	1240	84	1023	30
LD1-034	2885	151	2304	113	1929	65
LD1-035	1928	224	1084	106	820	35
LD1-036	2992	145	2458	106	2127	57
LD1-037	1554	216	637	67	481	17
LD1-038	2553	156	2130	105	1974	55
LD1-039	1743	182	1050	80	880	26
LD1-040	2030	307	1054	103	648	26
LD1-041	1280	346	569	70	407	15
LD1-042	1199	302	443	65	386	15
LD1-043	1526	263	520	67	401	15
LD1-044	3332	169	2665	129	2297	73
LD1-045	1210	504	452	103	403	24
LD1-046	2134	997	588	180	271	24
LD1-047	2070	231	1258	116	1068	40
LD1-048	817	561	306	85	316	20
LD1-049	2610	932	827	216	327	28
LD1-050	1105	556	367	97	358	23
LD1-051	1884	349	596	102	437	23
LD1-052	1897	272	668	88	507	20
LD1-053	2490	235	1149	116	804	31
LD1-054	2553	252	1388	139	1067	46
LD1-055	2278	551	521	140	309	26
LD1-056	1668	399	565	105	481	25
LD1-057	1666	774	965	212	688	47
LD1-057	866	85	785	31	758	14
LD1-058	3832	217	2561	163	1911	73
LD1-058	1573	69	1515	42	1478	28
LD1-059	2517	299	1408	162	1228	59
LD1-059	2306	34	1846	27	1471	20
LD1-060	1275	573	564	111	404	19
LD1-060	814	58	506	16	442	7
LD1-061	3760	235	2571	178	2104	90
LD1-061	2248	32	2249	28	2256	29
LD1-062	3068	436	1081	212	599	51
LD1-062	754	119	660	37	634	14
LD1-063	5816	193	1957	222	299	45
LD1-063	302	337	270	48	267	11
LD1-064	2690	1414	513	227	165	17
LD1-064	84	210	119	13	121	3
LD1-065	2971	300	1258	158	920	44
LD1-065	986	49	941	22	924	13
LD1-066	3704	565	938	252	366	44
LD1-066	1354	440	537	84	366	14
LD1-067	2545	637	836	171	345	22
LD1-067	605	74	487	19	463	8
LD1-068	3126	401	585	129	289	21
LD1-068	365	80	209	9	196	3
LD1-069	3956	263	2275	193	1661	79
LD1-069	2066	87	1643	37	1333	20
LD1-070	-460	1097	63	62	161	19
LD1-070	1852	36	1854	27	1859	24
LD1-071	3543	500	1831	319	1421	148
LD1-071	1586	71	1542	44	1513	29
LD1-072	2536	498	1276	182	665	35
LD1-072	2117	77	1661	32	1324	20
LD1-073	3582	449	612	153	276	24
LD1-073	1716	173	389	29	204	4
LD1-074	3900	795	832	285	350	52
LD1-074	379	108	440	23	452	9
LD1-075	2776	649	641	181	504	38
LD1-075	571	74	455	17	433	7
LD1-076	4124	677	766	241	283	33
LD1-076	568	145	415	29	389	9
LD1-077	3529	409	1929	265	1910	134
LD1-077	1819	52	1826	37	1835	30
LD1-078	1845	1292	632	264	349	36
LD1-078	299	132	364	23	375	8
LD1-079	567	964	478	188	459	29
LD1-079	523	70	557	19	567	9
LD1-080	4138	374	2486	289	2473	202
LD1-080	2309	39	2268	33	2226	32
LD1-081	4642	307	2393	226	1956	94
LD1-081	2121	35	2069	28	2021	26
LD1-082	4392	342	1872	231	1405	82
LD1-082	1551	59	1593	37	1627	27
LD1-083	2583	860	1902	315	1342	102
LD1-083	1508	51	1509	32	1511	23
LD1-084	4541	615	1184	311	610	75
LD1-084	968	50	944	23	935	13
LD1-085	3021	562	2565	266	2029	100
LD1-085	2520	34	2560	30	2614	33
LD1-086	4420	413	1548	252	1187	84
LD1-086	1419	42	1385	26	1365	18
LD1-087	4153	438	1212	230	887	63
LD1-087	1305	49	1235	27	1197	17
LD1-088	2149	1034	803	230	408	31
LD1-088	1086	70	680	25	565	10
LD1-089	5132	3751	215	185	76	15
LD1-089	2394	711	362	97	128	8
LD1-090	2599	744	1479	259	828	50
LD1-090	2291	38	2017	30	1762	24
LD1-091	2225	1010	932	249	484	35
LD1-091	1019	142	1005	42	998	16
LD1-092	5639	864	1218	375	649	91
LD1-092	1266	128	1188	43	1145	19
LD1-093	7564	347	1973	342	454	82
LD1-093	791	177	790	58	791	21
LD1-094	3284	657	1447	246	532	35
LD1-094	2546	37	2586	33	2639	36
LD1-095	6310	858	710	266	262	39
LD1-095	366	119	447	25	463	9
LD1-096	4258	2770	300	212	450	46
LD1-096	1153	52	853	22	743	11
LD1-097	644	131	531	23	505	8
LD1-098	1718	66	1809	45	1890	35
LD1-099	5	434	16	5	16.6	0.8
LD1-100	990	68	993	30	995	16
LD1-101	1777	42	1796	29	1815	24
LD1-102	701	304	564	74	531	21
LD1-103	361	226	350	36	349	8
LD1-104	292	215	267	28	265	8
LD1-105	1319	63	1164	33	1084	18
LD1-106	366	138	392	25	396	8
LD1-107	892	125	564	35	486	11
LD1-108	436	113	481	26	491	9
LD1-109	2411	41	2329	34	2239	30
LD1-110	969	92	910	37	887	17
LD1-111	907	284	943	106	959	43
LD1-112	892	245	592	49	517	14
LD1-113	-30	122	229	15	259	5
LD1-114	1829	50	1787	34	1752	26
LD1-115	495	104	491	24	490	9
LD1-116	550	84	500	21	490	8
LD1-117	2504	44	2570	37	2657	38
LD1-118	-2279	1790	-24	295	311	61
LD1-119	868	171	484	40	407	11
LD1-120	-255	227	247	37	310	9
LD1-121	421	112	257	15	239	5
LD1-122	874	98	851	36	843	15
LD1-123	237	123	250	15	251	5
LD1-124	1010	127	831	47	767	18
LD1-125	817	109	512	28	447	9
LD1-126	593	185	472	39	448	11
LD1-127	764	139	629	40	593	13
LD1-128	917	307	801	95	760	25
LD1-129	436	170	267	22	248	6
LD1-130	903	113	841	42	818	17
LD1-131	972	77	964	32	961	16
LD1-132	1235	77	978	34	868	15
LD1-133	2667	46	2697	38	2740	37
LD1-134	190	192	398	35	435	10
LD1-135	377	243	314	36	306	9
LD1-136	434	168	497	37	512	12
LD1-137	1789	94	1702	61	1635	39
LD1-138	1834	89	1798	59	1770	40
LD1-139	676	125	634	35	623	13
LD1-140	2084	99	1901	45	1738	26
LD1-141	2541	61	2450	51	2344	46
LD1-142	2491	58	2393	47	2282	41
LD1-143	503	327	314	38	289	8
LD1-144	1189	69	1269	35	1319	21
LD1-145	2574	50	2248	39	1910	27
LD1-146	195	159	265	21	273	6
LD1-147	1886	117	1847	77	1815	52
LD1-148	645	135	458	30	422	10
LD1-149	469	205	313	31	293	8
LD1-150	1266	181	924	74	788	28
LD1-151	1920	63	1948	43	1978	32
LD1-152	1572	163	700	41	460	10
LD1-153	1693	76	1676	47	1665	30
LD1-154	1694	73	1706	46	1720	30
LD1-155	2274	63	1922	45	1615	28
LD1-156	333	210	364	36	370	10
LD1-157	1474	88	1466	50	1462	29
LD1-158	646	127	487	30	455	10
LD1-159	1383	73	1149	36	1031	17
LD1-160	890	104	839	39	821	16
LD1-161	547	110	477	25	464	9
LD1-162	517	163	264	22	237	6
LD1-163	1023	123	556	34	450	11
LD1-164	758	108	517	27	466	9
LD1-165	465	94	446	21	443	8
LD1-166	173	168	245	21	253	6
LD1-167	2329	60	2304	45	2280	35
LD1-168	2453	66	2351	52	2240	41
LD1-169	-323	982	224	224	386	35
LD1-170	113	224	321	35	351	11
LD1-171	250	134	410	26	440	9
LD1-172	2531	59	2505	45	2479	35
LD1-173	897	85	895	33	897	15
LD1-174	773	285	528	52	472	12
LD1-175		240	228	25	251	6
LD1-176	354	135	407	26	418	9
LD1-177	1387	90	1414	49	1436	27
LD1-178	1372	103	1297	53	1256	27
LD1-179	339	115	402	22	415	8
LD1-180	-29	177	203	20	228	6
LD1-181	1031	101	769	36	684	13
LD1-182	1058	131	824	34	740	13
LD1-183	969	169	789	59	729	22
LD1-184	1765	117	1709	74	1668	47
LD1-185	581	86	467	20	443	7
LD1-186	2200	150	371	39	147	7
LD1-187	1875	38	1889	27	1895	23
LD1-188	538	102	451	22	433	8
LD1-189	1003	82	941	34	911	15
LD1-190	828	329	449	66	377	14
LD1-191	1748	52	1669	35	1601	24
LD1-192	232	168	301	24	308	7
LD1-193	273	145	283	20	283	6
LD1-194	434	108	447	23	448	8
LD1-195	920	214	543	41	457	10
LD1-196	-2	241	261	34	291	8
LD1-197	2315	56	2301	46	2279	42
LD1-198	877	114	812	40	786	16
LD1-199	295	128	284	18	282	5
LD1-200	1008	343	404	52	306	9
LD1-201	652	94	462	21	423	7
LD1-202	1084	59	1031	27	1004	15
LD1-203	760	124	763	41	762	16
LD1-204	355	88	423	18	434	7
LD1-205	-54	243	259	40	298	11
LD1-206	1510	59	1021	28	807	12
LD1-207	1874	58	1876	41	1873	31
LD1-208	886	61	963	26	995	14
LD1-209	2345	61	1876	28	1483	18
LD1-210	685	87	324	15	275	5
LD1-211	1031	119	698	39	597	14
LD1-212	299	178	416	33	436	10
LD1-213	623	108	482	25	452	9
LD1-214	295	128	306	19	307	6
LD1-215	178	230	121	14	118	3
LD1-216	2093	89	1637	38	1306	19
LD1-217	337	205	275	28	267	8
LD1-218	1106	70	1083	32	1071	17
LD1-219	2084	53	2089	40	2091	32
LD1-220	1785	50	1699	33	1628	23
LD1-221	450	64	466	15	468	7
LD1-222	1063	146	1036	44	1023	18
LD1-223	67	128	245	16	264	5
LD1-224	3613	80	1477	36	450	10
LD1-225	1904	63	1325	37	996	18
LD1-226	705	138	545	35	508	12
LD1-227	643	83	456	19	420	7
LD1-228	1109	100	967	42	905	18
LD1-229	566	80	477	19	458	7
LD1-230	212	132	240	16	242	5
LD1-231	1815	62	1778	41	1746	29
LD1-232	677	115	517	29	481	10
LD1-233	465	95	397	19	385	7
LD1-234	895	206	611	58	537	18
LD1-235	1061	136	626	29	513	9
LD1-236	193	184	390	33	424	10
LD1-237	1261	100	1031	45	926	19
LD1-238	61	245	380	49	434	15
LD1-239	446	275	431	42	428	10
LD1-240	1089	79	1157	37	1193	20
LD1-241	1234	157	1032	68	939	28
LD1-242	1072	115	940	32	884	14
LD1-243	2639	54	2385	45	2099	36
LD1-244	541	425	354	60	326	12
LD1-245	1030	167	1021	50	1016	19
LD1-246	625	114	469	26	438	9
LD1-247	474	119	445	25	439	9
LD1-248	569	202	458	42	437	11
LD1-249	481	230	187	22	164	5
LD1-250	368	391	290	57	281	11
LD1-251	977	111	975	45	975	20
LD1-252	1922	61	1933	42	1945	31
LD1-253	1112	165	359	32	254	8
LD1-254	941	619	363	88	279	14
LD1-255	2087	97	1842	43	1633	25
LD1-256	843	71	857	28	863	14
LD1-257	702	103	485	25	441	8
LD1-258	1346	76	1242	39	1185	20
LD1-259	1977	64	1943	44	1913	31
LD1-260	815	155	398	31	331	9
LD1-261	887	192	549	37	472	11
LD1-262	432	107	495	25	510	9
LD1-263	1283	85	1300	44	1313	24
LD1-264	1408	69	1228	36	1130	18
LD1-265	356	122	474	27	499	10
LD1-266	295	205	407	38	428	11
LD1-267	1279	108	1232	53	1207	27
LD1-268	2520	65	2492	52	2462	45
LD1-269	1692	92	1551	55	1452	31
LD1-270	621	238	335	39	296	10
LD1-271	1133	205	566	42	435	10
LD1-272	463	142	438	29	434	10
LD1-273	752	99	568	27	524	10
LD1-274	84	279	243	39	260	9
LD1-275	-42	170	204	18	231	5
LD1-276	540	121	288	18	258	5
LD1-277	2066	77	1953	53	1853	35
LD1-278	1595	79	1502	46	1440	26
LD1-279	1595	95	1100	46	869	19
LD1-280	1756	146	1566	60	1429	25
LD1-281	417	210	436	42	441	13
LD1-282	178	261	153	22	152	5
LD1-283	2044	75	2000	51	1964	35
LD1-284	888	150	767	51	728	19
LD1-285	1549	107	1437	59	1367	31
LD1-286	188	216	391	39	428	12
LD1-287	37	200	241	25	263	7
LD1-288	670	110	335	19	289	6
LD1-289	1806	84	1797	53	1795	33
LD1-290	2388	135	2326	67	2256	45
LD1-291	380	200	281	28	270	8
LD1-292	-126	173	203	22	237	6
LD1-293	500	159	457	34	450	11
LD1-294	694	153	449	33	404	10
LD1-295	674	131	447	29	406	9
LD1-296	2765	72	2739	58	2712	47
LD1-297	347	142	286	20	279	6
LD1-298	204	157	403	30	441	10
LD1-299	332	147	434	29	455	10
LD1-300	660	150	875	52	965	22
LD1-301	923	111	951	44	966	20
LD1-302	253	201	214	22	211	6
LD1-303	671	161	469	36	430	11
LD1-304	505	183	449	38	440	12
LD1-305	739	121	709	38	702	15
LD1-306	901	114	934	45	952	20
LD1-307	1565	101	1508	57	1473	31
LD1-308	691	301	284	32	237	7
LD1-309	-23	182	281	28	325	9
LD1-310	2555	87	2414	67	2258	49
LD1-311	315	205	250	25	244	7
LD1-312	544	204	268	27	239	7

## Sheet: LD3
	207Pb/206Pb	1s	207Pb/235U	1s	206Pb/238U	1s
LD3-001	2012	62	1966	26	1922	25
LD3-002	382	93	424	19	432	8
LD3-003	404	63	398	14	397	6
LD3-004	656	94	472	23	436	8
LD3-005	749	53	711	19	700	11
LD3-006	766	68	706	24	687	11
LD3-007	427	68	448	16	453	7
LD3-008	1796	47	1653	33	1543	25
LD3-009	555	54	559	16	561	8
LD3-010	804	57	811	23	815	12
LD3-011	493	80	442	18	433	7
LD3-012	1741	44	1772	32	1799	27
LD3-013	1987	28	1991	24	1996	25
LD3-014	16	224	292	35	328	10
LD3-015	381	178	309	20	299	5
LD3-016	927	90	852	23	823	12
LD3-017	981	52	807	22	745	11
LD3-018	886	48	943	22	968	14
LD3-019	444	85	448	19	449	8
LD3-020	920	61	992	27	1025	16
LD3-021	503	90	422	19	407	7
LD3-022	576	57	428	14	401	6
LD3-023	658	98	429	15	388	6
LD3-024	394	215	420	32	425	7
LD3-025	1055	51	994	24	968	15
LD3-026	844	195	57	7	40	1
LD3-027	149	99	240	12	250	5
LD3-028	1471	175	1469	67	1468	30
LD3-029	1916	29	1922	24	1928	24
LD3-030	811	122	328	22	264	6
LD3-031	1943	58	1859	24	1785	23
LD3-032		199	339	27	391	7
LD3-033	404	60	455	14	466	7
LD3-034	16	247	24	4	24.4	0.8
LD3-035	489	115	437	24	428	9
LD3-036	2047	30	2045	25	2043	26
LD3-037	1575	37	1590	26	1603	22
LD3-038	607	278	247	27	211	5
LD3-039	431	58	443	14	446	7
LD3-040	765	50	596	16	553	8
LD3-041	213	99	306	15	318	6
LD3-042	1750	36	1764	27	1778	24
LD3-043	82	193	201	15	211	4
LD3-044	2343	35	2365	31	2392	34
LD3-045	372	77	430	17	441	7
LD3-046	828	47	823	20	822	12
LD3-047	1872	34	1863	26	1856	25
LD3-048	591	175	303	27	268	7
LD3-049	1896	36	1741	27	1617	22
LD3-050	1284	98	1285	34	1285	19
LD3-051	385	93	415	19	421	7
LD3-052	1037	86	920	36	873	17
LD3-053	657	97	472	23	435	8
LD3-054	1411	41	1214	24	1108	16
LD3-055	1493	42	1411	27	1359	19
LD3-056	754	86	488	22	434	8
LD3-057	2307	35	2152	29	1995	27
LD3-058	1808	37	1880	28	1948	26
LD3-059	1415	56	528	18	347	6
LD3-060	2075	90	2074	41	2073	31
LD3-061	493	72	456	17	449	7
LD3-062	319	73	434	16	456	7
LD3-063	335	97	255	13	247	5
LD3-064	313	125	256	16	251	5
LD3-065	1199	99	1173	49	1160	26
LD3-066	902	103	767	36	722	15
LD3-067	1680	49	1676	33	1674	26
LD3-068	432	230	252	22	233	4
LD3-069	244	85	240	11	240	4
LD3-070	-154	218	140	21	161	5
LD3-071	1921	38	1895	29	1873	25
LD3-072	2463	43	2434	37	2402	37
LD3-073	448	91	416	19	411	7
LD3-074	718	100	436	22	385	8
LD3-075	282	102	442	21	474	9
LD3-076	384	89	390	18	392	7
LD3-077	339	250	308	28	304	7
LD3-078	1892	45	1842	32	1799	26
LD3-079	687	148	486	25	445	8
LD3-080	442	151	195	11	175	3
LD3-081	169	197	285	27	299	8
LD3-082	-160	160	208	20	247	6
LD3-083	2506	43	2495	37	2484	37
LD3-085	226	234	260	30	264	8
LD3-086		200	16	1	16.1	0.5
LD3-087	754	68	508	19	456	8
LD3-088	1040	112	1026	33	1020	16
LD3-089	353	92	390	18	397	7
LD3-090	645	81	489	20	457	8
LD3-091	2045	73	1853	31	1686	23
LD3-092	1700	58	1704	38	1710	28
LD3-093	1917	47	1955	35	1993	29
LD3-094	410	109	445	23	452	9
LD3-095	949	104	934	29	927	14
LD3-096	690	153	419	32	372	10
LD3-097	2312	84	2017	39	1741	27
LD3-098	2514	45	2514	38	2517	36
LD3-099	759	214	730	65	722	21
LD3-100	678	97	784	34	823	16
LD3-101	603	230	511	40	490	12
LD3-102	1606	67	1591	42	1581	28
LD3-103	591	81	442	19	414	7
LD3-104	194	83	231	10	235	4
LD3-105	239	141	362	25	382	8
LD3-106	760	178	828	62	855	25
LD3-107	73	96	222	12	236	4
LD3-108	2072	55	2083	41	2098	34
LD3-109	518	134	388	26	367	8
LD3-110	735	85	779	30	796	15
LD3-111	1509	152	1437	58	1390	27
LD3-112	1910	52	1948	37	1987	30
LD3-113	601	286	314	43	278	10
LD3-114	1057	185	1028	56	1014	18
LD3-115	422	122	434	25	437	9
LD3-116	1764	55	1716	36	1681	26
LD3-117	332	98	127	7	116	2
LD3-118	358	113	354	20	354	7
LD3-119	591	108	484	26	462	9
LD3-120	1654	56	1668	36	1682	26
LD3-121	93	249	244	32	261	8
LD3-122	823	115	492	29	425	10
LD3-123	1247	67	1211	35	1192	20
LD3-124	322	128	310	20	309	7
LD3-125	474	426	476	77	476	16
LD3-126	550	299	490	50	477	10
LD3-127	2188	63	2147	48	2107	38
LD3-128	581	79	335	15	301	5
LD3-129	1829	85	1819	57	1812	41
LD3-130	967	127	891	34	860	15
LD3-131	2207	95	2050	45	1898	29
LD3-132	551	42	317	8	286	4
LD3-133	992	74	1054	34	1086	19
LD3-134	273	127	251	16	249	5
LD3-135	1548	45	1606	30	1653	24
LD3-136	1083	99	1073	30	1068	15
LD3-137	465	92	439	20	435	8
LD3-138	1069	47	1058	23	1055	15
LD3-139	1101	82	1139	39	1161	21
LD3-140	999	72	852	29	797	14
LD3-141	1103	159	368	31	262	7
LD3-142	1554	47	1557	30	1560	23
LD3-143	1611	43	1635	29	1656	23
LD3-144	2293	87	1274	33	759	13
LD3-145	1189	49	1070	25	1013	15
LD3-146	398	147	305	22	293	6
LD3-148	412	211	307	24	293	6
LD3-149	358	115	305	18	298	6
LD3-150	2567	31	2571	28	2579	32
LD3-151	703	110	723	36	731	15
LD3-152	474	102	441	22	435	8
LD3-153	2380	38	2375	33	2373	35
LD3-154	1559	40	1493	26	1449	20
LD3-155	431	150	334	25	321	8
LD3-156	474	133	465	21	463	7
LD3-157	1855	35	1880	27	1905	24
LD3-158	614	110	763	36	816	15
LD3-159	1844	71	1939	50	2033	40
LD3-160	426	82	261	12	244	4
LD3-161	440	139	538	33	563	12
LD3-162	569	73	437	17	413	7
LD3-163	1867	38	1932	29	1997	26
LD3-164	267	110	426	22	456	8
LD3-165	454	149	257	19	236	6
LD3-166	397	116	310	18	300	6
LD3-167	791	80	829	30	844	14
LD3-168	578	75	555	21	550	9
LD3-169	416	163	404	31	402	10
LD3-170	690	95	621	19	602	9
LD3-171	507	84	275	13	249	4
LD3-172	290	138	421	27	447	10
LD3-173	458	113	257	15	236	5
LD3-174	1806	40	1855	29	1903	25
LD3-175	941	152	841	55	805	21
LD3-176	1791	52	1815	36	1840	29
LD3-177	264	152	329	24	339	8
LD3-178	1842	38	1855	28	1870	24
LD3-179	1692	45	1684	31	1682	24
LD3-180	425	142	298	21	283	6
LD3-181	2599	36	2645	32	2710	34
LD3-182	580	95	480	23	460	8
LD3-183	991	69	977	30	973	16
LD3-184	901	65	942	28	962	15
LD3-185	690	108	493	26	453	9
LD3-186	155	219	440	42	498	12
LD3-187	2282	41	2314	34	2354	32
LD3-188	1092	75	899	31	824	14
LD3-189	947	68	947	29	949	15
LD3-190	1856	49	1882	35	1911	29
LD3-191	2217	44	2228	35	2246	32
LD3-192	2105	45	2030	34	1962	28
LD3-193	344	118	401	23	412	8
LD3-194	561	112	463	25	444	9
LD3-195	320	82	448	18	475	8
LD3-196	183	128	268	17	279	6
LD3-197	2948	39	2651	35	2285	31
LD3-198	931	60	757	23	701	11
LD3-199	606	275	336	34	298	7
LD3-200	932	67	919	28	916	15
LD3-201	1623	78	1711	50	1789	36
LD3-202	1754	56	1700	37	1662	26
LD3-203	404	176	269	23	255	7
LD3-204	476	150	264	20	241	6
LD3-205	1127	92	1167	44	1191	24
LD3-206	521	121	734	38	808	17
LD3-207	1233	69	1257	36	1275	21
LD3-208	1052	66	981	29	952	15
LD3-209	424	91	310	15	296	5
LD3-210	400	97	386	19	385	7
LD3-211	-13	243	132	20	140	4
LD3-212	1861	48	1906	34	1952	27
LD3-213	491	280	401	40	386	9
LD3-214	593	126	464	28	440	10
LD3-215	1328	58	1314	32	1309	20
LD3-216	787	89	814	33	826	15
LD3-217	2501	50	2526	42	2564	39
LD3-218	1556	136	1512	53	1481	27
LD3-219	361	114	450	24	469	9
LD3-220	547	125	476	28	463	10
LD3-221	1761	60	1722	39	1696	27
LD3-222	269	143	289	20	293	6
LD3-223	1559	56	1520	34	1497	22
LD3-224	1159	92	1094	42	1065	21
LD3-225	303	138	326	22	331	7
LD3-226	954	79	929	33	921	16
LD3-227	749	194	271	27	220	6
LD3-228	1680	138	1440	54	1284	23
LD3-229	1545	104	1453	39	1391	22
LD3-230	546	104	316	17	287	6
LD3-231	1897	57	1930	39	1967	29
LD3-232	638	133	478	30	447	10
LD3-233	1560	73	1505	43	1472	26
LD3-234	685	215	347	28	299	7
LD3-235	867	88	768	31	737	14
LD3-236	1320	110	1183	37	1110	18
LD3-237	205	225	249	28	255	8
LD3-238	1171	166	924	68	827	28
LD3-239	786	125	280	19	224	5
LD3-240	658	111	378	22	335	7
LD3-241	545	122	447	26	431	9
LD3-242	834	95	963	38	1024	19
LD3-243	36	140	249	18	273	6
LD3-244	2100	59	2066	42	2041	31
LD3-245	1857	63	1827	42	1807	28
LD3-246	1972	63	1763	42	1598	26
LD3-247	557	214	338	34	308	8
LD3-248	2146	62	2060	45	1983	32
LD3-249	1932	64	1909	43	1895	30
LD3-250	655	146	477	34	443	11
LD3-251	1858	65	1863	43	1875	30
LD3-252	182	174	410	33	453	11
LD3-253	1538	72	1644	44	1735	29
LD3-254	1257	80	1177	39	1139	20
LD3-255	911	115	500	29	417	9
LD3-256	1539	125	1426	47	1352	23
LD3-257	2118	97	1804	43	1545	25
LD3-258	-14	188	221	22	249	6
LD3-259	842	79	847	30	853	15
LD3-260	307	113	320	18	324	6
LD3-261	1234	92	541	27	394	8
LD3-262	1967	67	2001	47	2044	36
LD3-263	351	311	278	33	269	6
LD3-264	1413	91	1292	48	1226	25
LD3-265	490	187	304	28	282	8
LD3-266	-12	186	426	37	513	13
LD3-267	906	97	816	36	786	15
LD3-268	1672	80	1599	49	1550	30
LD3-269	668	109	499	27	465	9
LD3-270	1049	86	957	36	921	17
LD3-271	708	192	406	37	356	9
LD3-272		198	82	7	84	2
LD3-273	1130	85	1055	38	1022	19
LD3-274	1632	122	1531	48	1459	26
LD3-275	457	231	153	19	134	4
LD3-276	644	130	450	29	414	9
LD3-277	697	174	533	43	497	13
LD3-278	1102	180	395	38	285	9
LD3-279	1141	97	1187	46	1215	24
LD3-280	234	179	423	35	460	12
LD3-281	894	96	807	35	778	15
LD3-282	673	142	458	31	417	10
LD3-283	2481	70	2332	53	2169	37
LD3-284	143	181	327	29	353	9
LD3-285	1366	111	1367	58	1370	30
LD3-286	2641	74	2577	59	2500	48
LD3-287	1169	106	579	31	441	9
LD3-288	489	165	254	21	229	6
LD3-289	1423	241	436	58	273	13
LD3-290	1848	87	1704	54	1592	30
LD3-291	1033	110	903	43	852	18
LD3-292	1111	101	938	41	868	17
LD3-293	1082	132	880	50	803	19
LD3-294	298	167	120	11	111	3
LD3-295	1273	106	1158	50	1098	23
LD3-296	1948	87	1786	55	1651	30
LD3-297	988	129	865	48	819	19
LD3-298	616	142	413	29	378	9
LD3-299	1845	100	1660	60	1519	31
LD3-300	973	139	645	42	556	14
LD3-301	899	136	774	46	732	17
LD3-302	448	184	238	22	218	6
LD3-303	983	168	719	40	638	13
LD3-304	2609	93	2454	70	2274	48
LD3-305	512	160	260	21	233	6
LD3-306	1830	155	1562	64	1371	28
LD3-307	672	245	271	34	227	8
LD3-308	562	212	258	27	226	7
LD3-309	498	213	412	41	397	12
LD3-310	1024	132	825	48	754	17
LD3-311	1632	114	1529	63	1458	31
LD3-312	760	166	496	39	441	12
LD3-313	402	206	226	24	210	6
LD3-314	507	167	292	25	267	7
LD3-315	286	200	286	28	286	8
LD3-316	1994	115	1807	71	1651	36
LD3-317	840	184	298	29	234	7
LD3-318	2043	117	1952	75	1871	41
LD3-319	614	209	254	27	218	7
LD3-320	260	210	222	23	219	6

## Sheet: LD4
	207Pb/206Pb	1s	207Pb/235U	1s	206Pb/238U	1s
LD4-001	985	274	787	94	721	34
LD4-002	1862	72	1831	50	1807	38
LD4-003	2733	43	2726	39	2723	43
LD4-004	1203	58	1192	31	1188	19
LD4-005	805	92	797	33	796	15
LD4-006	671	232	354	40	308	10
LD4-007	1881	57	1682	39	1530	27
LD4-008	951	418	304	49	227	6
LD4-009	393	142	265	14	251	5
LD4-010	1354	88	1285	47	1247	27
LD4-011	173	152	92	8	89	2
LD4-012	613	95	511	24	489	9
LD4-013	1406	108	1121	53	981	25
LD4-014	946	119	999	50	1025	24
LD4-015	1431	55	1364	32	1325	21
LD4-016	612	193	452	41	422	12
LD4-017	810	151	699	48	666	18
LD4-018	-38	138	273	20	315	7
LD4-019	798	155	605	44	556	15
LD4-020	954	195	513	50	421	15
LD4-021		337	392	64	461	14
LD4-022	1545	75	1556	46	1567	31
LD4-023	2475	49	2318	40	2147	34
LD4-024	1066	93	1135	44	1174	24
LD4-025	481	107	441	23	434	9
LD4-026	760	141	672	43	647	16
LD4-027	354	209	268	28	258	8
LD4-028	1304	91	1326	49	1342	28
LD4-029	893	90	933	37	952	19
LD4-030	2439	54	2430	44	2422	39
LD4-031	2494	60	2431	50	2360	45
LD4-032	466	121	470	27	471	10
LD4-033	940	134	637	28	555	11
LD4-034	609	110	463	26	435	9
LD4-035	532	156	379	29	355	9
LD4-036	392	639	342	100	335	20
LD4-037	451	392	435	66	432	14
LD4-038	1961	68	1988	48	2016	37
LD4-039	2345	59	2316	45	2286	37
LD4-040	1684	69	1619	43	1571	28
LD4-041	844	145	700	46	656	18
LD4-042	885	114	940	46	965	22
LD4-043	-16	235	398	51	473	16
LD4-044	1471	224	1109	74	934	23
LD4-045	400	151	447	31	457	11
LD4-046	429	202	291	29	275	8
LD4-047	949	175	579	35	489	10
LD4-048		361	316	58	360	13
LD4-049	1034	178	548	48	439	14
LD4-050	911	126	578	36	497	12
LD4-051	891	668	405	107	325	20
LD4-052	2552	74	2503	59	2444	49
LD4-053	989	99	874	39	829	18
LD4-054	1346	104	1359	56	1368	32
LD4-055	829	164	563	44	499	15
LD4-056	336	135	441	28	462	11
LD4-057	432	128	257	17	238	6
LD4-058	997	352	500	62	398	12
LD4-059	1171	108	1047	49	989	23
LD4-060	2648	81	2607	65	2555	55
LD4-061	2176	88	2155	64	2133	47
LD4-062	955	114	852	44	813	19
LD4-063	391	206	347	35	340	11
LD4-064	1269	103	1135	49	1066	24
LD4-065	486	182	433	36	424	11
LD4-066	1235	147	1045	45	957	20
LD4-067	383	328	287	37	275	8
LD4-068	567	209	492	47	476	15
LD4-069	979	300	370	55	281	13
LD4-070	477	135	465	30	463	10
LD4-071	311	99	200	11	191	4
LD4-072	760	93	645	29	612	12
LD4-073	823	160	334	28	268	7
LD4-074	567	90	525	23	516	10
LD4-075	2850	40	2788	36	2704	38
LD4-076	547	92	463	21	446	8
LD4-077	1062	101	1144	47	1188	26
LD4-078	356	143	441	29	457	10
LD4-079	2080	63	2165	49	2257	45
LD4-080	804	157	815	55	819	23
LD4-081	915	104	761	37	710	15
LD4-082	505	232	120	15	102	3
LD4-083	1029	224	346	42	253	10
LD4-084	822	93	878	36	901	18
LD4-085	2578	100	2553	50	2522	47
LD4-086	1436	68	1458	40	1474	26
LD4-087	996	74	904	31	867	16
LD4-088	331	221	432	44	451	14
LD4-089	441	123	617	34	666	14
LD4-090	981	119	1051	51	1086	24
LD4-091	1922	59	1990	42	2057	35
LD4-092	687	105	540	28	506	11
LD4-093	333	173	289	25	284	7
LD4-094	95	279	219	33	231	8
LD4-095	12	187	234	23	257	7
LD4-096	1953	102	1725	43	1544	27
LD4-097	822	78	835	30	840	16
LD4-098	359	141	407	27	416	10
LD4-099	758	207	318	34	261	9
LD4-100	2630	57	2641	49	2656	48
LD4-101	2211	80	2331	63	2472	60
LD4-102	481	178	262	23	238	6
LD4-103	1732	83	1431	50	1238	27
LD4-104	224	178	370	32	394	11
LD4-105	814	450	316	66	253	12
LD4-106	633	148	501	36	473	12
LD4-107	1137	79	1205	40	1242	24
LD4-108	1158	95	1167	46	1173	25
LD4-109	682	132	806	46	851	21
LD4-110	1399	95	1424	53	1440	33
LD4-111	1311	92	1370	50	1409	30
LD4-112	1866	71	1945	49	2021	38
LD4-113	213	102	316	17	330	7
LD4-114	133	136	376	26	416	10
LD4-115	-39	380	239	61	272	13
LD4-116	1015	191	559	53	454	17
LD4-117	406	308	277	41	262	10
LD4-118	541	198	448	42	430	14
LD4-119	2120	102	2027	75	1937	58
LD4-120	336	145	441	30	461	11
LD4-121	948	138	816	51	768	21
LD4-122	1145	102	1180	50	1199	27
LD4-123	421	101	449	23	454	10
LD4-124	-22	190	401	37	479	14
LD4-125	2164	78	2220	57	2281	45
LD4-126	1345	96	1383	52	1407	31
LD4-127	674	124	804	43	852	21
LD4-128	796	102	843	39	861	19
LD4-129	1259	70	1164	22	1113	16
LD4-130	476	77	497	19	503	9
LD4-131	785	46	889	21	934	14
LD4-132	413	117	477	27	492	10
LD4-133	549	227	224	26	195	7
LD4-134	541	363	420	69	400	18
LD4-135	910	57	969	26	998	16
LD4-136	562	80	504	21	493	9
LD4-137	838	113	812	28	802	13
LD4-138	1146	106	1076	32	1042	17
LD4-139	1214	81	1113	25	1062	16
LD4-140	273	65	217	8	213	4
LD4-141	417	121	441	26	447	10
LD4-142	-159	235	330	51	412	14
LD4-143	928	90	677	19	604	10
LD4-144	2466	39	2292	35	2107	34
LD4-145	1320	40	1189	24	1121	17
LD4-146	702	88	541	24	505	10
LD4-147	1028	46	893	21	842	13
LD4-148	1067	98	1132	46	1169	25
LD4-149	793	97	841	36	862	18
LD4-150	1527	48	1514	31	1508	24
LD4-151	1038	60	985	28	964	16
LD4-152	712	82	548	23	510	9
LD4-153	481	96	626	28	669	13
LD4-154	373	147	503	34	534	13
LD4-155	512	180	502	31	500	9
LD4-156	473	105	426	22	418	8
LD4-157	739	115	834	42	872	20
LD4-158	1457	47	1424	29	1406	21
LD4-159	384	190	265	25	252	7
LD4-160	719	152	604	30	574	10
LD4-161	666	178	363	32	317	9
LD4-162	1587	68	1672	44	1744	33
LD4-163	547	118	437	26	417	9
LD4-164	1880	54	1805	38	1745	30
LD4-165	996	60	1068	29	1105	18
LD4-166	1787	52	1811	36	1835	29
LD4-167	534	94	435	21	417	8
LD4-168	793	65	548	19	492	8
LD4-169	649	111	849	40	929	20
LD4-170	341	184	211	15	200	4
LD4-171	489	74	534	20	545	10
LD4-172	278	203	252	26	249	8
LD4-173	749	76	728	27	723	13
LD4-174	1828	52	1831	36	1836	28
LD4-175	1341	75	471	21	313	6
LD4-176	1170	75	1126	37	1105	21
LD4-177	422	150	440	31	444	11
LD4-178	639	195	408	38	368	11
LD4-179	379	190	379	34	380	10
LD4-180	2323	54	2307	43	2292	37
LD4-181	814	98	454	23	387	8
LD4-182	671	92	512	24	478	9
LD4-183	520	75	545	21	553	10
LD4-184	1915	60	1870	42	1831	31
LD4-185	1960	66	1939	47	1923	35
LD4-186	471	154	298	23	277	7
LD4-187	441	91	496	22	509	10
LD4-188	1940	65	2066	46	2196	37
LD4-189	1759	106	1537	42	1382	24
LD4-190	776	102	569	29	519	11
LD4-191	169	128	202	14	205	5
LD4-192	1435	136	1221	47	1104	21
LD4-193	1848	41	1818	30	1793	26
LD4-194	699	93	482	23	438	9
LD4-195	1759	49	1749	35	1743	28
LD4-196	288	340	301	43	303	9
LD4-197	431	100	307	16	292	6
LD4-198	1485	50	1571	32	1637	26
LD4-199	656	67	536	19	509	9
LD4-200	1610	48	1566	32	1536	24
LD4-201	1434	44	1303	27	1225	18
LD4-202	531	82	498	21	491	9
LD4-203	852	54	898	24	918	14
LD4-204	234	143	237	17	238	5
LD4-205	1354	89	914	25	742	12
LD4-206	386	70	468	17	485	8
LD4-207	2247	39	2212	32	2176	30
LD4-208	-7	162	227	19	251	6
LD4-209	552	382	456	64	437	15
LD4-210	816	87	711	30	679	13
LD4-211	641	71	517	19	490	8
LD4-212	2013	87	1966	38	1921	30
LD4-213	226	107	331	18	347	7
LD4-214	1732	80	1301	46	1057	24
LD4-215	1386	61	1173	32	1062	18
LD4-216	862	133	789	47	764	19
LD4-217	1184	107	1103	34	1063	18
LD4-218	552	84	509	22	500	9
LD4-219	577	91	465	22	443	8
LD4-220	37	86	199	10	213	4
LD4-221	519	227	455	36	442	10
LD4-222	981	181	649	40	558	13
LD4-223	850	66	826	26	818	14
LD4-224	1480	167	1420	63	1381	26
LD4-225	700	306	322	37	272	7
LD4-226	524	183	213	20	186	5
LD4-227	587	187	257	18	222	5
LD4-228	-99	160	107	10	119	3
LD4-229	862	458	22	4	15.3	0.6
LD4-230	78	283	259	42	279	10
LD4-231	1878	65	1878	45	1879	34
LD4-232	2035	56	1955	40	1881	30
LD4-233	615	77	556	22	542	10
LD4-234	1437	139	1372	51	1331	25
LD4-235	26	278	270	36	298	8
LD4-236	1834	61	1900	42	1962	32
LD4-237	484	253	336	31	315	7
LD4-238	463	143	438	30	433	10
LD4-239	376	100	450	22	465	9
LD4-240	1461	79	1329	44	1250	24
LD4-241	486	109	460	25	455	10
LD4-242	863	164	596	46	528	16
LD4-243	433	123	265	17	246	6
LD4-244	1326	90	811	36	636	13
LD4-245	2223	119	2006	55	1802	34
LD4-246	1018	85	997	37	988	19
LD4-247	76	158	102	9	104	3
LD4-248	1043	94	924	39	876	18
LD4-249	874	98	823	37	805	17
LD4-250	1463	90	1451	51	1444	30
LD4-251	1738	138	1680	57	1634	32
LD4-252	411	112	432	24	437	9
LD4-253	2353	115	2305	56	2252	41
LD4-254	482	140	308	22	285	7
LD4-255	950	178	161	17	113	4
LD4-256	2211	76	2098	54	1985	37
LD4-257	1416	124	1328	45	1274	21
LD4-258	634	104	434	23	398	8
LD4-259	1673	40	1568	28	1492	22
LD4-260	1495	43	1007	23	799	12
LD4-261	461	193	59	6	50	1
LD4-262	469	72	476	18	478	8
LD4-263	437	211	259	21	240	5
LD4-264	1147	54	1123	28	1112	18
LD4-265	312	85	290	13	288	5
LD4-266	904	58	847	24	826	13
LD4-267	448	64	447	15	447	7
LD4-268	1701	117	1523	46	1399	24
LD4-269	282	92	311	15	315	6
LD4-270	1172	52	1088	27	1048	17
LD4-271	2403	73	1616	31	1083	17
LD4-272	1990	45	1871	33	1767	27
LD4-273	471	80	473	19	474	8
LD4-274	578	72	458	18	435	8
LD4-275	391	103	436	22	446	9
LD4-276	499	164	443	25	433	9
LD4-277	442	82	440	19	440	8
LD4-278	604	95	481	23	456	9
LD4-279	695	110	575	31	546	12
LD4-280	610	104	461	24	433	9
LD4-281	980	58	977	27	977	16
LD4-282	614	83	588	24	582	11
LD4-283	698	116	347	21	297	7
LD4-284	413	201	177	18	160	4
LD4-285	411	80	448	18	456	8
LD4-286	498	72	532	20	541	9
LD4-287	2434	46	2434	39	2438	36
LD4-288	639	82	493	21	463	9
LD4-289	525	95	346	17	320	6
LD4-290	1227	70	1267	37	1293	23
LD4-291	1314	68	1457	40	1560	28
LD4-292	497	88	443	20	433	8
LD4-293	837	69	723	25	688	12
LD4-294	1608	65	1547	41	1505	27
LD4-295	2509	51	2520	43	2536	40
LD4-296	1674	61	1594	39	1536	26
LD4-297	160	232	233	27	240	7
LD4-298	2227	95	2091	44	1956	33
LD4-299	2089	113	1962	52	1844	32
LD4-300	673	90	626	27	615	12
LD4-301	340	89	299	14	294	6
LD4-302	2580	59	2579	49	2580	47
LD4-303	347	244	308	28	303	7
LD4-304	194	127	108	8	104	2
LD4-305	524	90	492	22	486	10
LD4-306	374	99	449	22	465	9
LD4-307	290	137	404	26	425	10
LD4-308	1684	70	1634	44	1598	29
LD4-309	336	97	437	21	457	9
LD4-310	538	102	481	25	470	10
LD4-311	1818	70	1858	48	1897	35
LD4-312	922	85	914	35	912	18
LD4-313	523	96	498	24	494	10
LD4-314	314	110	409	22	426	9
LD4-315	1490	84	1089	42	901	19
LD4-316	1137	94	911	39	821	18
LD4-317	2497	69	2525	54	2562	47
LD4-318	1730	75	1756	49	1780	33
LD4-319	477	296	273	31	249	6
LD4-320	372	103	430	22	441	9
LD4-321	255	90	156	8	150	3
LD4-322	3163	34	3356	34	3685	48
LD4-323	56	130	237	16	255	6
LD4-324	757	74	735	26	727	13
LD4-325	635	77	700	26	720	13
LD4-326	1967	52	1912	39	1859	32
LD4-327	944	90	927	37	919	19
LD4-328	2235	42	1937	33	1669	26
LD4-329	448	152	444	32	443	11
LD4-330	1494	46	1476	29	1464	22
LD4-331	1179	60	1249	33	1290	22
LD4-332	474	81	427	18	418	8
LD4-333	644	62	625	20	619	10
LD4-334	1139	79	887	33	789	15
LD4-335	677	115	519	29	484	11
LD4-336	600	92	459	22	431	8
LD4-337	2553	41	2614	36	2695	38
LD4-338	369	83	432	18	444	8
LD4-339	1732	54	1666	36	1617	27
LD4-340	660	196	513	34	480	10
LD4-341	661	194	487	33	451	9
LD4-342	1188	142	1035	44	964	17
LD4-343	781	125	799	30	805	14
LD4-344	719	83	601	25	572	11
LD4-345	524	114	453	25	440	9
LD4-346	702	125	492	30	449	10
LD4-347	911	169	374	33	294	9
LD4-348	387	80	448	18	461	8
LD4-349	600	72	471	18	446	8
LD4-350	279	105	331	18	340	7
LD4-351	1541	55	1485	34	1451	23
LD4-352	493	291	435	44	424	10
LD4-353	515	138	315	22	290	7
LD4-354	385	98	428	21	438	9
LD4-355	1189	71	1162	36	1152	21
LD4-356	913	71	915	30	919	16
LD4-357	1975	57	1773	40	1612	27
LD4-358	1810	59	1770	40	1742	29
LD4-359	588	122	484	29	465	10
LD4-360	894	136	797	34	763	14
LD4-361	449	118	515	29	532	11
LD4-362	1021	417	368	73	274	15
LD4-363	162	155	228	18	235	6
LD4-364	1158	85	946	37	862	17
LD4-365	633	165	792	55	855	24
LD4-366	291	211	295	31	297	9
LD4-367	273	135	271	19	272	6
LD4-368	508	110	460	25	453	10
LD4-369	442	132	256	18	237	6
LD4-370	478	92	470	22	471	9
LD4-371	894	111	535	30	458	10
LD4-372	496	109	472	25	470	10
LD4-373	711	172	481	40	437	12
LD4-374	1589	80	1582	48	1586	30
LD4-375	957	93	885	37	862	18
LD4-376	2491	76	768	34	318	7
LD4-377	1797	80	1677	51	1593	31
LD4-378	672	272	326	33	280	7
LD4-379	438	172	445	36	450	12
LD4-380	462	166	478	37	486	13
LD4-381	1159	97	1072	45	1037	22
LD4-382	2412	76	2322	57	2237	42
LD4-383	910	105	750	37	703	15
LD4-384	1357	95	1335	50	1332	28

## Sheet: LD5
	207Pb/206Pb	1s	207Pb/235U	1s	206Pb/238U	1s
LD5-001	1546	43	1657	29	1747	26
LD5-002	466	77	425	17	417	7
LD5-003	2409	29	2344	27	2272	29
LD5-004	1634	37	1606	26	1585	22
LD5-005	578	98	482	16	462	7
LD5-006	487	55	412	13	399	6
LD5-007	872	110	509	20	432	7
LD5-008	1077	84	968	24	921	13
LD5-009	995	90	931	24	904	14
LD5-010	152	135	294	20	312	6
LD5-011	773	94	640	19	602	9
LD5-012	1518	62	1227	20	1069	14
LD5-013	2711	28	2599	27	2460	31
LD5-014	1643	120	1432	45	1294	26
LD5-015	720	119	454	19	403	7
LD5-016	463	57	393	13	381	6
LD5-017	88	174	45	4	44	1
LD5-018	941	44	890	20	871	13
LD5-019	421	78	436	17	440	8
LD5-020	2309	38	2259	33	2205	33
LD5-021	285	108	205	12	198	4
LD5-022	384	69	345	13	340	6
LD5-023	2732	30	2588	29	2411	31
LD5-024	485	90	324	16	303	6
LD5-025	2334	36	1916	30	1556	23
LD5-026	988	60	947	27	931	15
LD5-027	1619	42	1562	28	1522	22
LD5-028	1094	150	443	25	328	7
LD5-029	639	89	452	14	417	6
LD5-030	336	95	264	13	257	5
LD5-031	2427	35	2356	30	2278	30
LD5-032	849	60	765	23	738	12
LD5-033	976	106	897	28	866	14
LD5-034	990	54	948	25	931	15
LD5-035	518	89	535	23	539	10
LD5-036	467	76	455	18	453	8
LD5-037	2354	38	2105	31	1861	26
LD5-038	369	99	381	19	383	7
LD5-039	2409	71	1897	32	1466	22
LD5-040	764	70	793	26	804	14
LD5-041	378	74	409	16	416	7
LD5-042	328	109	264	15	257	5
LD5-043	1280	62	1234	33	1210	21
LD5-044	191	189	278	26	289	8
LD5-045	871	138	679	31	622	12
LD5-046	1708	53	1664	36	1631	26
LD5-047	414	109	289	16	274	6
LD5-048	532	63	495	17	488	8
LD5-049	401	86	408	18	410	8
LD5-050	503	83	237	11	211	4
LD5-051	59	124	216	15	231	5
LD5-052	1545	61	1578	39	1605	28
LD5-053	1557	93	1467	35	1406	23
LD5-054	2099	55	1996	41	1900	32
LD5-055	634	151	333	26	292	8
LD5-056	793	128	466	21	402	8
LD5-058	971	65	947	29	938	16
LD5-059	52	116	225	14	243	5
LD5-060	625	104	609	30	606	13
LD5-061	2466	51	1999	39	1582	26
LD5-062	649	183	323	22	279	6
LD5-063	576	83	476	21	456	9
LD5-064	1185	100	1095	47	1052	24
LD5-065	3366	57	3047	31	2588	34
LD5-066	553	65	309	12	278	5
LD5-067	1889	34	1782	26	1694	22
LD5-068	1448	98	1349	35	1287	19
LD5-069	1635	52	1559	34	1506	24
LD5-070	1989	34	1934	27	1885	25
LD5-071	747	153	285	17	232	4
LD5-072	855	124	793	30	771	12
LD5-073	542	76	449	18	431	7
LD5-074	573	54	439	13	415	6
LD5-075	1564	69	1059	35	832	16
LD5-076	175	163	130	8	128	2
LD5-077	1040	49	934	23	891	13
LD5-078	366	86	271	13	260	5
LD5-079	463	93	294	15	273	5
LD5-080	507	100	268	14	242	5
LD5-081	228	127	265	17	270	6
LD5-082	975	53	739	20	665	10
LD5-083	709	85	259	13	212	4
LD5-084	507	394	17	4	14	0.6
LD5-085	849	53	788	21	768	12
LD5-086	571	194	489	33	472	8
LD5-087	408	92	434	20	439	8
LD5-088	1792	40	1713	29	1651	23
LD5-089	1428	73	1303	25	1229	17
LD5-090	691	88	635	27	621	12
LD5-091	312	121	349	21	355	7
LD5-092	355	115	248	15	237	5
LD5-093	373	138	251	18	238	5
LD5-094	427	112	254	15	236	5
LD5-095	735	112	762	38	772	17
LD5-096	32	104	244	14	267	5
LD5-097	79	208	259	27	280	8
LD5-098	172	107	216	12	220	4
LD5-099	417	79	420	17	421	7
LD5-100	1021	54	961	25	935	15
LD5-101	426	78	402	16	399	7
LD5-102	605	65	570	19	562	9
LD5-103	559	83	544	23	541	10
LD5-104	236	70	153	6	148	3
LD5-105	2695	45	2668	39	2634	38
LD5-106	2341	82	1909	37	1537	24
LD5-107	1404	53	1410	32	1415	22
LD5-108	476	102	285	16	262	5
LD5-109	567	70	519	19	508	9
LD5-110	513	82	427	18	412	8
LD5-111	910	67	1003	30	1046	18
LD5-112	1871	92	1384	35	1091	18
LD5-113	1105	75	1007	34	963	18
LD5-114	415	1161	16	12	13.6	0.8
LD5-115	1804	57	1602	37	1454	24
LD5-116	3088	48	3027	44	2938	46
LD5-117	174	119	224	14	229	5
LD5-118	1985	57	1784	40	1618	27
LD5-119	278	88	403	18	425	8
LD5-120	225	277	288	40	296	11
LD5-121	955	73	1022	33	1054	19
LD5-122	816	142	769	34	753	14
LD5-123	529	230	675	66	720	26
LD5-124	828	73	827	28	827	15
LD5-125	529	86	534	23	536	10
LD5-126	464	111	228	14	205	4
LD5-127	1381	66	1428	38	1459	25
LD5-128	179	126	104	7	101	2
LD5-129	940	62	830	25	791	13
LD5-130	1370	92	1260	32	1197	18
LD5-131	1854	67	1377	25	1090	15
LD5-132	-121	127	41	3	44.7	0.9
LD5-133	448	68	433	16	431	7
LD5-134	651	56	502	15	471	7
LD5-135	1655	51	1587	33	1539	24
LD5-136	1941	40	1851	30	1775	25
LD5-137	443	87	439	19	439	8
LD5-138	318	106	206	8	196	3
LD5-139	690	216	549	40	515	11
LD5-140	430	92	228	11	209	4
LD5-141	509	68	435	16	421	7
LD5-142	877	54	779	21	746	11
LD5-143	1144	47	981	23	911	13
LD5-144	641	156	462	35	427	11
LD5-145	1812	44	1738	31	1679	24
LD5-146	1942	41	1843	30	1760	24
LD5-147	459	83	287	13	266	5
LD5-148	510	68	440	16	428	7
LD5-149	520	92	314	15	287	5
LD5-150	609	61	510	17	489	8
LD5-151	572	77	527	20	517	9
LD5-152	384	101	269	14	256	5
LD5-153	1226	98	1127	31	1076	16
LD5-154	1547	95	1411	35	1323	20
LD5-155	1003	91	798	23	727	11
LD5-156	1825	54	1721	37	1639	26
LD5-157	439	115	218	13	198	4
LD5-158	2607	43	2347	36	2062	29
LD5-159	459	82	450	19	449	8
LD5-160	531	84	466	20	454	8
LD5-161	775	77	616	24	574	10
LD5-162	379	93	283	14	272	5
LD5-163	448	128	391	24	381	8
LD5-164	532	72	481	18	471	8
LD5-165	328	111	237	14	229	5
LD5-166	1465	108	41	3	21	0.6
LD5-167	1451	62	1387	36	1348	22
LD5-168	2337	50	2004	38	1699	26
LD5-169	570	90	413	19	386	7
LD5-170	804	69	737	25	716	12
LD5-171	1658	61	1497	37	1388	23
LD5-172	430	86	241	11	222	4
LD5-173	472	87	392	18	379	7
LD5-174	1089	68	984	31	939	16
LD5-175	517	94	444	21	431	8
LD5-176	614	77	506	20	483	9
LD5-177	674	332	298	38	252	6
LD5-178	959	96	914	39	897	18
LD5-179	580	88	439	20	413	8
LD5-180	645	82	454	19	418	8
LD5-181	2380	99	1475	41	930	17
LD5-182	2614	60	2484	48	2332	38
LD5-183	877	142	594	29	522	10
LD5-184	1895	67	1827	45	1769	30
LD5-185	575	350	454	56	431	10
LD5-186	157	138	219	16	225	5
LD5-187	1164	89	905	37	803	16
LD5-188	610	176	481	29	455	9
LD5-189	888	89	403	20	324	6
LD5-190	676	100	472	24	432	9
LD5-191	381	93	274	14	262	5
LD5-192	443	117	391	23	383	8
LD5-193	909	45	918	21	926	14
LD5-194	2389	36	2418	32	2463	34
LD5-195	-81	118	74	5	81	2
LD5-196	350	74	388	15	396	7
LD5-197	789	67	430	16	368	6
LD5-198	-176	167	176	19	208	5
LD5-199	1357	73	1322	41	1306	25
LD5-200	894	104	772	25	731	12
LD5-201	626	405	292	47	252	8
LD5-202	215	96	224	11	226	4
LD5-203	480	171	290	25	268	7
LD5-204	-36	163	95	9	102	2
LD5-205	80	79	212	10	225	4
LD5-206	-155	106	189	11	222	4
LD5-207	-254	204	182	25	223	6
LD5-208	320	81	417	17	437	8
LD5-209	1646	57	1640	37	1640	28
LD5-210	477	114	330	19	311	7
LD5-211	493	78	457	19	452	8
LD5-212	715	91	664	29	651	12
LD5-213	440	71	337	13	324	6
LD5-214	517	117	449	26	437	9
LD5-215	1839	81	1556	52	1360	32
LD5-216	488	105	403	21	390	8
LD5-217	1476	91	1395	33	1343	21
LD5-218	732	65	562	20	523	9
LD5-219	185	102	242	13	248	5
LD5-220	883	70	912	29	927	16
LD5-221	2413	48	2089	37	1782	27
LD5-222	488	96	257	14	233	5
LD5-223	234	142	391	27	419	10
LD5-224	503	76	464	18	457	8
LD5-225	1377	70	534	22	360	7
LD5-226	1010	69	984	31	974	17
LD5-227	320	154	303	23	302	7
LD5-228	1646	61	1423	37	1282	22
LD5-229	757	82	736	29	731	14
LD5-230	1102	79	1061	37	1044	20
LD5-231	730	109	497	27	449	10
LD5-232	1827	63	1788	42	1758	30
LD5-233	658	110	711	35	729	15
LD5-234	548	130	415	27	392	9
LD5-235	1124	142	629	31	500	10
LD5-236	1973	73	1861	50	1766	34
LD5-237	2503	63	2382	49	2246	39
LD5-238	327	124	256	16	249	5
LD5-239	2157	65	1853	45	1598	28
LD5-240	1307	79	1290	42	1282	24
LD5-241	494	103	451	23	443	9
LD5-242	1745	76	1532	46	1385	26
LD5-243	1133	90	1048	41	1009	20
LD5-244	2556	68	2230	52	1895	34
LD5-245	416	143	232	17	215	5
LD5-246	1172	97	1056	44	1002	21
LD5-247	852	93	810	34	795	16
LD5-248	1573	94	1593	56	1611	35
LD5-249	832	142	492	35	423	11
LD5-250	217	123	235	15	238	5
LD5-251	2249	80	2186	58	2121	40
LD5-252	558	139	444	30	423	10
LD5-253	844	116	810	42	798	18
LD5-254	660	126	452	29	413	10
LD5-255	605	150	324	25	286	8
LD5-256	1819	91	1340	51	1061	23
LD5-257	966	85	795	32	739	14
LD5-258	838	89	744	31	716	13
LD5-259	658	91	581	26	564	10
LD5-260	739	106	753	36	762	15
LD5-261	870	84	854	32	852	15
LD5-262	973	82	827	32	778	14
LD5-263	544	168	326	28	298	8
LD5-264	552	237	330	38	301	10
LD5-265	395	182	251	23	237	7
LD5-266	2097	57	2066	43	2042	35
LD5-267	1916	52	1817	37	1737	27
LD5-268	948	148	740	49	675	18
LD5-269	515	90	419	20	403	8
LD5-270	-117	390	18	6	20	1
LD5-271	754	91	603	27	565	11
LD5-272	798	96	749	33	734	14
LD5-273	2454	55	2427	44	2400	40
LD5-274	393	105	488	25	510	10
LD5-275	913	159	529	42	445	13
LD5-276	272	112	266	15	265	5
LD5-277	766	126	769	43	771	18
LD5-278	1423	65	1178	34	1052	19
LD5-279	436	152	301	23	285	7
LD5-280	391	110	259	15	245	5
LD5-281	906	189	861	70	845	29
LD5-282	1609	73	1563	45	1532	29
LD5-283	2289	66	2397	52	2530	48
LD5-284	2568	72	2437	60	2287	53
LD5-285	798	95	712	32	686	14
LD5-286	1404	78	1371	44	1352	27
LD5-287	117	138	265	19	283	7
LD5-288	2412	67	2412	53	2417	46
LD5-289	1005	90	1097	42	1146	24
LD5-290	1479	76	1511	45	1537	30
LD5-291	117	155	416	32	473	13
LD5-292	968	104	483	27	387	9
LD5-293	87	171	248	22	266	8
LD5-294	285	122	387	23	405	10
LD5-295	356	135	427	28	441	11
LD5-296	279	107	411	22	435	10
LD5-297	2157	78	2231	58	2316	47
LD5-298	738	111	813	41	842	20
LD5-299	2358	85	2422	67	2504	60
LD5-300	563	129	630	38	650	17

## Sheet: LD6
	207Pb/206Pb	1s	207Pb/235U	1s	206Pb/238U	1s
LD6-001	332	363	280	43	274	8
LD6-002	310	215	463	45	495	15
LD6-003	436	101	425	21	424	8
LD6-004	-28	175	73	7	78	2
LD6-005	848	543	342	74	272	13
LD6-006	512	164	397	31	378	10
LD6-007	447	242	345	30	330	7
LD6-008	2098	51	2145	40	2195	36
LD6-009	469	137	328	23	309	7
LD6-010	2366	46	2131	36	1899	29
LD6-011	448	123	490	28	499	10
LD6-012	57	154	272	21	298	7
LD6-013	2720	44	2685	39	2642	39
LD6-014	362	97	525	24	564	11
LD6-015	864	78	954	33	995	18
LD6-016	1442	62	1173	33	1033	18
LD6-017	396	83	432	18	439	8
LD6-018	2466	50	2494	42	2531	40
LD6-019	443	114	311	18	294	6
LD6-020	933	74	921	31	917	16
LD6-021	2119	158	2093	74	2067	47
LD6-022	1488	58	1525	36	1554	25
LD6-023	1599	150	1360	56	1213	23
LD6-024	589	92	470	22	447	9
LD6-025	1678	61	1610	39	1560	26
LD6-026	630	452	380	67	340	10
LD6-027	657	148	461	33	423	11
LD6-028	2046	63	1883	44	1740	31
LD6-029	347	169	265	23	256	7
LD6-030	567	210	330	33	298	8
LD6-031	173	119	416	24	462	10
LD6-032	951	127	771	45	711	18
LD6-033	378	153	419	30	427	10
LD6-034	1061	75	971	33	933	17
LD6-035	2179	67	2207	50	2238	40
LD6-036	2607	59	2599	48	2592	42
LD6-037	372	104	442	23	456	9
LD6-038	349	100	429	21	445	9
LD6-039	250	197	345	33	360	10
LD6-040	3145	59	3019	51	2835	45
LD6-041	420	275	336	34	324	8
LD6-042	1881	79	1775	52	1689	33
LD6-043	1987	77	1970	54	1957	38
LD6-044	742	765	444	166	389	36
LD6-045	410	112	444	24	451	10
LD6-046	430	166	287	24	270	7
LD6-047	1206	109	1133	52	1096	25
LD6-048	924	107	967	44	987	22
LD6-049	1067	120	901	48	836	20
LD6-050	2128	82	2140	59	2155	43
LD6-051	454	131	324	22	307	7
LD6-052	1737	89	1703	56	1678	35
LD6-053	867	123	934	49	964	23
LD6-054	426	142	359	25	349	8
LD6-055	517	178	329	29	303	8
LD6-056	228	146	250	19	253	6
LD6-057	1293	105	840	42	680	16
LD6-058	1843	94	1827	60	1816	39
LD6-059	497	347	325	42	302	9
LD6-060	401	155	256	20	241	6
LD6-061	1934	94	1981	63	2029	43
LD6-062	578	117	444	26	419	10
LD6-063	1006	189	1040	80	1058	37
LD6-064	-334	272	224	41	288	10
LD6-065	45	145	396	28	461	10
LD6-066	2303	125	1786	55	1379	31
LD6-067	234	138	265	18	269	6
LD6-068	346	193	373	33	379	10
LD6-069	295	141	462	30	498	11
LD6-070	1911	55	1927	39	1949	30
LD6-071	2033	66	1648	44	1368	26
LD6-072	151	159	382	29	423	10
LD6-073	830	116	834	42	839	18
LD6-074	884	122	530	33	453	11
LD6-075	399	108	455	24	467	9
LD6-076	1898	62	1893	43	1895	32
LD6-077	564	158	317	25	286	7
LD6-078	973	83	562	24	467	9
LD6-079	417	213	230	25	213	7
LD6-080	1600	68	1524	41	1475	26
LD6-081	672	129	512	32	479	11
LD6-082	500	275	460	44	452	11
LD6-083	727	144	601	40	571	15
LD6-084		182	283	20	319	7
LD6-085	2431	62	2202	48	1972	36
LD6-086	956	78	952	33	953	17
LD6-087	580	152	500	36	485	12
LD6-088	524	135	282	20	254	6
LD6-089	1005	87	1015	38	1023	19
LD6-090	1931	70	1694	46	1514	27
LD6-091	890	93	810	34	783	15
LD6-092	467	106	441	23	437	9
LD6-093	2338	68	2303	52	2271	41
LD6-094	1788	71	1828	46	1869	32
LD6-095	2092	107	1840	47	1626	29
LD6-096	826	212	390	42	322	12
LD6-097	1904	77	1957	52	2012	36
LD6-098	1759	83	1738	53	1725	34
LD6-099	537	226	455	36	439	9
LD6-100	85	360	245	44	262	8
LD6-101	876	167	524	43	449	13
LD6-102	318	224	283	31	280	9
LD6-103	468	130	541	33	561	13
LD6-104	138	437	250	67	262	14
LD6-105	351	196	447	40	467	13
LD6-106	238	172	418	34	452	12
LD6-107	448	151	308	23	291	7
LD6-108	189	363	217	38	220	7
LD6-109	733	394	467	65	415	14
LD6-110	1095	120	1095	54	1098	26
LD6-111	1125	106	1095	48	1084	23
LD6-112	1123	519	79	17	49	3
LD6-113	986	316	380	45	288	9
LD6-114	687	173	538	44	505	15
LD6-115	1797	95	1893	61	1987	40
LD6-116	615	146	506	35	484	12
LD6-117	-128	157	105	10	118	3
LD6-118	744	156	712	49	705	18
LD6-119	-28	213	281	34	321	11
LD6-120	1172	575	401	86	280	12
LD6-121	664	132	521	33	491	12
LD6-122	552	154	281	22	250	7
LD6-123	1237	617	455	103	316	16
LD6-124	2773	140	2516	73	2210	48
LD6-125	1899	110	1589	66	1370	33
LD6-126	-473	354	199	44	269	10
LD6-127	682	342	647	71	637	19
LD6-128	531	189	368	34	343	10
LD6-129	833	117	368	23	300	7
LD6-130	381	213	402	39	407	11
LD6-131	731	139	280	21	230	6
LD6-132	630	127	476	30	447	10
LD6-133	1166	229	563	47	425	11
LD6-134	2184	148	1811	110	1511	77
LD6-135	918	132	559	36	477	12
LD6-136	1006	101	816	38	751	15
LD6-137	502	147	455	31	447	10
LD6-138	908	253	360	34	281	8
LD6-139	128	294	225	37	236	7
LD6-140	1093	197	376	40	272	10
LD6-141	523	183	781	58	878	24
LD6-142	639	119	641	35	644	14
LD6-143	569	134	464	30	446	10
LD6-144	-1690	1130	40	216	402	32
LD6-145	1141	169	992	50	925	19
LD6-146	1594	86	1206	44	1005	19
LD6-147	458	123	424	25	419	9
LD6-148	1669	90	1518	52	1419	28
LD6-149	536	175	333	28	306	7
LD6-150	5	200	191	16	207	5
LD6-151	525	315	282	33	253	7
LD6-152	1025	211	1017	63	1013	22
LD6-153	1911	92	1782	58	1681	34
LD6-154	674	127	451	28	411	9
LD6-155	1017	213	897	59	850	19
LD6-156	1405	153	1101	50	954	19
LD6-157	402	143	248	18	233	5
LD6-158	1747	93	1643	56	1569	30
LD6-159	1235	128	904	51	777	19
LD6-160	1022	115	914	45	874	19
LD6-161	2393	89	2299	63	2203	40
LD6-162	1878	559	1342	192	1032	56
LD6-163	2587	90	2515	68	2437	48
LD6-164	333	132	377	24	386	8
LD6-165	362	178	239	21	228	6
LD6-166	467	141	239	18	217	5
LD6-167	2571	93	2533	69	2495	47
LD6-168	2419	95	2407	68	2403	46
LD6-169	1104	127	1076	55	1067	24
LD6-170	1671	112	1556	63	1479	32
LD6-171	798	193	310	31	250	7
LD6-172	319	218	232	26	225	7
LD6-173	602	161	445	34	417	11
LD6-175	2436	105	2417	76	2404	51
LD6-176	313	203	370	35	381	11
LD6-177	1617	124	1561	69	1526	35
LD6-178	1139	248	814	65	700	18
LD6-179	922	144	943	55	956	23
LD6-180	1428	133	1369	68	1338	32
LD6-181	364	299	574	75	631	27
LD6-182	873	147	792	50	767	19
LD6-183	680	166	464	37	424	11
LD6-184	1939	124	1833	76	1748	40
LD6-185	1793	150	1721	91	1670	51
LD6-186	2509	120	2311	85	2102	50
LD6-187	377	214	297	31	288	9
LD6-188	2015	129	1739	79	1526	37
LD6-189	1059	163	900	62	841	23
LD6-190	291	228	271	31	270	9
LD6-191	554	267	425	52	404	15
LD6-192	1960	191	1830	84	1718	42
LD6-193	583	192	319	23	284	6
LD6-194	1685	49	1441	31	1284	20
LD6-195	895	89	901	35	904	17
LD6-196	281	120	430	24	459	9
LD6-197	686	483	301	60	253	10
LD6-198	2087	69	1909	30	1749	24
LD6-199	1836	39	1945	29	2051	28
LD6-200	416	271	267	27	250	6
LD6-201	691	68	485	18	444	7
LD6-202	733	109	486	27	436	9
LD6-203	365	167	297	18	289	5
LD6-204	1729	71	1314	26	1074	15
LD6-205	569	172	294	26	261	7
LD6-206	669	172	680	50	684	17
LD6-207	558	60	467	15	450	7
LD6-208	369	83	299	13	291	5
LD6-209	610	65	637	20	646	10
LD6-210	902	55	835	23	811	12
LD6-211	418	214	387	29	382	8
LD6-212	522	66	331	12	305	5
LD6-213	2143	72	2041	32	1941	26
LD6-214	456	137	291	20	272	6
LD6-215	240	104	420	21	454	8
LD6-216	957	76	577	23	486	9
LD6-217	1526	100	498	19	305	5
LD6-218	1526	49	1497	31	1478	22
LD6-219	636	80	468	19	435	8
LD6-220	873	300	402	45	325	8
LD6-221	925	57	768	22	717	11
LD6-222	600	222	262	22	225	5
LD6-223	550	85	380	17	353	6
LD6-224	380	315	279	34	267	5
LD6-225	1784	50	1035	27	719	11
LD6-226	675	67	384	14	338	6
LD6-227	417	118	406	23	405	8
LD6-228	1632	54	1570	35	1526	24
LD6-229	629	577	22	6	16.7	0.7
LD6-230	2194	52	2121	40	2049	33
LD6-231	2553	45	2493	37	2423	34
LD6-232	261	95	262	13	263	5
LD6-233	202	128	251	16	257	6
LD6-234	749	75	510	20	459	8
LD6-235	562	87	429	19	405	7
LD6-236	689	89	598	26	575	11
LD6-237	1681	60	1723	39	1760	28
LD6-238	847	143	834	37	829	15
LD6-239	1237	210	256	23	162	3
LD6-240	215	103	225	12	226	4
LD6-241	2472	55	1585	38	1008	17
LD6-242	301	131	397	25	415	9
LD6-243	2503	56	2443	45	2374	38
LD6-244	1956	95	1874	42	1800	29
LD6-245	369	122	210	14	197	4
LD6-246	2617	55	2600	45	2581	39
LD6-247	614	96	452	22	421	8
LD6-248	2145	59	1940	42	1758	28
LD6-249	1802	87	1779	57	1763	39
LD6-250	-154	219	135	21	155	5
LD6-251	164	126	225	15	232	5
LD6-252	1676	94	270	17	137	3
LD6-253	2405	67	2341	52	2272	42
LD6-254	1978	67	1963	47	1952	34
LD6-255	1808	69	1810	46	1814	31
LD6-256	867	108	806	39	785	17
LD6-257	1773	57	1785	38	1795	29
LD6-258	985	69	906	29	874	15
LD6-259	945	238	305	29	228	5
LD6-260	586	88	450	20	424	8
LD6-261	488	115	274	16	250	5
LD6-262	1137	59	1072	29	1041	16
LD6-263	811	112	679	24	640	11
LD6-264	478	345	296	39	273	7
LD6-265	260	199	246	24	244	7
LD6-266	2016	65	1901	46	1800	33
LD6-267	2420	49	2413	39	2407	35
LD6-268	620	132	466	21	436	8
LD6-269	256	93	322	15	332	6
LD6-270	324	86	287	13	284	5
LD6-271	357	129	288	19	280	6
LD6-272	583	69	425	16	397	7
LD6-273	528	107	448	24	433	9
LD6-274	635	100	461	23	428	9
LD6-275	524	140	410	20	390	7
LD6-276	2753	54	2695	45	2624	40
LD6-277	386	114	286	17	275	6
LD6-278	1855	160	1804	70	1761	37
LD6-279	2275	60	2247	45	2220	36
LD6-280	1320	142	1278	50	1252	23
LD6-281	2471	61	1971	45	1533	26
LD6-282	708	117	243	16	198	4
LD6-283	894	83	817	32	791	15
LD6-284	245	114	224	13	223	5
LD6-285	673	139	272	20	228	6
LD6-286	118	154	258	20	275	6
LD6-287	2042	76	2034	54	2029	40
LD6-288	1438	78	1303	42	1224	23
LD6-289	470	103	416	22	408	9
LD6-290	1863	76	1758	49	1673	31
LD6-291	474	376	314	47	292	8
LD6-292	204	133	215	15	216	5
LD6-293	387	126	379	24	378	9
LD6-294	1121	194	1148	62	1163	27
LD6-295	681	693	295	89	249	12
LD6-296	467	115	397	23	386	9
LD6-297	173	129	218	15	223	5
LD6-298	3116	1749	4839	1360	9734	5143
LD6-299	475	144	301	22	279	7
LD6-300	626	120	755	40	800	19

## Sheet: LD7
	207Pb/206Pb	1s	207Pb/235U	1s	206Pb/238U	1s
LD7-001	907	50	912	22	915	14
LD7-002	776	59	727	22	712	11
LD7-003	524	162	447	34	433	11
LD7-004	1026	59	728	22	635	10
LD7-005	688	70	361	14	312	5
LD7-006	630	63	458	16	425	7
LD7-007	1006	205	566	41	463	11
LD7-008	1884	79	1730	33	1606	23
LD7-009	1068	93	445	15	334	5
LD7-010	1678	98	1652	40	1633	25
LD7-011	177	165	58	5	55	1
LD7-012	262	92	156	8	150	3
LD7-013	1870	44	1815	32	1771	25
LD7-014	502	84	414	18	399	7
LD7-015	456	97	372	18	360	7
LD7-016	1760	85	1132	29	834	13
LD7-017	680	109	785	38	823	17
LD7-018	1251	59	455	16	314	5
LD7-019	904	134	814	34	781	13
LD7-020	359	181	341	22	338	7
LD7-021	458	210	253	20	232	4
LD7-022	638	72	512	19	485	8
LD7-023	422	73	431	16	433	7
LD7-024	2512	47	2463	39	2408	37
LD7-025	329	108	413	22	430	8
LD7-026	1946	53	1076	29	700	12
LD7-027	814	219	760	53	742	15
LD7-028	298	97	275	14	273	5
LD7-029	229	209	26	3	24.1	0.7
LD7-030	1491	96	1233	33	1091	17
LD7-031	458	79	407	17	398	7
LD7-032	329	150	291	21	287	7
LD7-033	68	114	363	21	411	8
LD7-034	2398	51	2336	40	2272	34
LD7-035	477	95	444	21	439	8
LD7-036	382	125	430	26	440	9
LD7-037	2557	51	2411	41	2247	33
LD7-038	838	105	722	35	687	15
LD7-039	349	90	425	19	440	8
LD7-040	270	103	427	21	458	9
LD7-041	1697	62	1591	39	1515	25
LD7-042	714	98	564	27	528	11
LD7-043	540	98	452	22	435	8
LD7-044	885	73	866	29	860	15
LD7-045	752	79	648	25	621	11
LD7-046	308	127	111	8	102	2
LD7-047	1344	75	1239	39	1182	21
LD7-048	536	132	423	19	403	7
LD7-049	414	113	409	23	409	8
LD7-050	1677	75	1610	46	1563	29
LD7-051	1588	73	1498	43	1439	26
LD7-052	796	97	637	30	595	12
LD7-053	641	188	452	30	416	8
LD7-054	2572	67	2395	54	2198	42
LD7-055	2120	67	2019	47	1927	32
LD7-056	440	107	397	21	391	8
LD7-057	2070	73	1999	51	1936	35
LD7-058	618	233	494	39	468	11
LD7-059	940	95	822	36	781	16
LD7-060	2001	73	1947	50	1903	34
LD7-061	1129	138	1005	41	949	18
LD7-062	902	128	827	47	802	20
LD7-063	464	124	311	20	292	7
LD7-064	1593	89	1391	50	1267	27
LD7-065	978	59	893	25	863	13
LD7-066	491	124	479	28	478	10
LD7-067	544	74	287	12	258	4
LD7-068	3455	58	2744	31	1886	25
LD7-069	523	193	398	27	377	8
LD7-070	580	60	465	15	444	7
LD7-071	2136	39	1978	30	1836	25
LD7-072	703	263	277	28	230	5
LD7-073	406	134	387	25	386	8
LD7-074		419	36	9	37	2
LD7-075	382	100	424	21	434	8
LD7-076	-58	198	46	6	49	2
LD7-077	935	119	851	31	820	13
LD7-078	1724	46	1665	31	1625	23
LD7-079	850	84	472	21	399	7
LD7-080	316	93	211	11	203	4
LD7-081	647	59	494	16	464	7
LD7-082	654	82	701	27	719	13
LD7-083	291	141	430	28	459	10
LD7-084	459	97	451	22	451	8
LD7-085	1566	85	1148	28	940	15
LD7-086	258	118	245	15	245	5
LD7-087	2218	46	2068	36	1930	29
LD7-088	397	67	318	12	309	5
LD7-089	469	85	450	19	449	8
LD7-090	690	68	559	20	530	9
LD7-091	240	131	231	16	232	5
LD7-092	541	92	530	24	530	10
LD7-093		158	184	11	199	5
LD7-094	1251	99	431	24	295	7
LD7-095	509	126	271	18	246	5
LD7-096	660	71	525	19	497	8
LD7-097	625	98	729	32	767	15
LD7-098	2302	113	2303	55	2304	37
LD7-099	257	101	413	20	443	8
LD7-100	1500	64	1552	39	1598	27
LD7-101	130	112	119	8	120	2
LD7-102	419	134	302	21	289	7
LD7-103	-21	175	296	26	340	9
LD7-104	348	90	395	18	405	7
LD7-105	691	72	742	25	763	13
LD7-106	323	113	402	22	419	9
LD7-107	209	121	384	23	416	9
LD7-108	1039	80	919	33	874	16
LD7-109	2011	60	2063	43	2126	35
LD7-110	374	160	227	18	214	5
LD7-111	136	159	201	17	208	5
LD7-112	849	182	698	41	653	13
LD7-113	488	244	48	6	40	1
LD7-114	1388	69	820	29	630	12
LD7-115	1160	75	1059	35	1017	19
LD7-116	1030	80	1110	38	1158	21
LD7-117	839	78	923	32	964	17
LD7-118	807	86	836	33	851	16
LD7-119	2366	60	2389	46	2429	38
LD7-120	61	117	249	16	270	6
LD7-121	85	156	362	28	408	10
LD7-122	615	98	705	32	737	15
LD7-123	4956	190	5118	289	5554	1063
LD7-124	462	103	204	12	184	4
LD7-125	832	98	268	15	209	4
LD7-126	1090	80	1044	37	1027	19
LD7-127	1684	75	1727	48	1772	33
LD7-128	1365	75	1171	38	1075	20
LD7-129	2304	35	1979	28	1686	22
LD7-130	597	73	653	23	671	11
LD7-131	969	92	816	35	762	15
LD7-132	1191	285	70	12	42	2
LD7-133	1082	70	897	29	825	14
LD7-134	831	145	473	34	403	11
LD7-135	2917	33	2869	31	2804	35
LD7-136	569	264	338	41	306	9
LD7-137	1688	117	1622	48	1572	26
LD7-138	440	70	398	15	391	6
LD7-139	635	78	456	19	422	7
LD7-140	690	137	324	23	276	6
LD7-141	860	74	868	29	872	15
LD7-142	213	150	266	20	273	6
LD7-143	234	89	235	11	235	4
LD7-144	1379	46	1291	27	1241	17
LD7-145	1732	101	1318	38	1079	16
LD7-146	799	65	782	24	778	12
LD7-147	49	94	231	12	249	4
LD7-148	556	93	502	23	492	9
LD7-149	210	111	275	15	283	5
LD7-150	405	149	385	20	382	6
LD7-151	450	62	446	15	446	7
LD7-152	618	162	429	33	396	10
LD7-153	559	67	398	14	372	6
LD7-154	641	104	264	15	224	4
LD7-155	1663	51	1583	33	1529	23
LD7-156	741	85	740	29	742	13
LD7-157	1493	101	1398	38	1336	20
LD7-158	777	81	683	26	657	12
LD7-159	803	178	438	28	372	7
LD7-160	432	341	223	30	203	4
LD7-161	523	77	424	17	407	7
LD7-162	2409	47	2415	38	2431	34
LD7-163	563	115	314	19	283	6
LD7-164	1011	68	924	29	892	15
LD7-165	1499	59	1463	35	1443	23
LD7-166	1537	57	1508	35	1493	23
LD7-167	325	567	65	23	59	3
LD7-168	744	89	740	30	742	14
LD7-169	1163	65	967	29	886	15
LD7-170	398	97	433	21	442	8
LD7-171	1025	69	902	29	857	14
LD7-172	181	245	216	21	219	4
LD7-173	655	90	497	23	466	9
LD7-174	331	105	266	15	260	5
LD7-175	11	121	203	14	221	5
LD7-176	2083	3146	6	7	2.2	0.9
LD7-177	1837	99	1555	40	1357	22
LD7-178	798	138	711	31	684	12
LD7-179	509	112	280	17	255	5
LD7-180	1525	109	1435	41	1376	23
LD7-181	671	99	616	29	604	12
LD7-182	505	85	410	18	395	7
LD7-183	1097	83	960	36	905	17
LD7-184	1801	66	1709	43	1642	28
LD7-185	808	87	674	28	638	12
LD7-186	706	418	313	50	263	7
LD7-187	798	162	773	39	764	15
LD7-188	416	102	365	19	359	7
LD7-189	224	122	238	15	241	5
LD7-190	602	100	516	26	499	10
LD7-191	1846	71	1764	47	1703	30
LD7-192	1256	83	1116	40	1051	20
LD7-193	571	90	447	20	423	8
LD7-194	2083	85	923	27	516	9
LD7-195	597	66	446	16	417	7
LD7-196	1771	36	1743	27	1720	23
LD7-197	636	84	424	19	386	7
LD7-198	514	107	429	23	414	8
LD7-199	974	65	683	23	598	10
LD7-200	1827	37	1428	25	1176	16
LD7-201	543	105	295	16	264	5
LD7-202	506	118	298	18	273	6
LD7-203	679	182	469	30	427	8
LD7-204	2097	36	2018	29	1943	26
LD7-205	1082	113	856	30	771	13
LD7-206	2155	41	2195	34	2240	35
LD7-207	1301	140	1223	48	1179	20
LD7-208	388	105	450	23	463	9
LD7-209	420	90	393	18	389	7
LD7-210	1377	47	858	22	671	10
LD7-211	867	55	920	24	943	14
LD7-212	580	82	386	17	355	6
LD7-213	1877	104	1702	44	1563	25
LD7-214	643	94	432	21	393	8
LD7-215	659	179	484	30	448	8
LD7-216	2451	49	2416	42	2376	41
LD7-217	1171	51	886	23	777	12
LD7-218	503	111	333	19	309	6
LD7-219	1985	43	1947	32	1913	27
LD7-220	620	127	596	25	590	10
LD7-221	847	214	357	29	286	6
LD7-222	1831	49	1621	33	1465	23
LD7-223	862	126	642	27	581	10
LD7-224	2497	41	2343	34	2173	30
LD7-225	727	59	614	19	585	9
LD7-226	666	90	497	23	462	9
LD7-227	705	80	476	20	430	8
LD7-228	1965	51	1789	36	1643	26
LD7-229	1845	49	1709	33	1602	24
LD7-230	2534	48	2425	40	2299	36
LD7-231	1595	57	1517	35	1463	24
LD7-232	854	84	522	23	450	9
LD7-233	723	72	622	23	595	10
LD7-234	368	86	411	18	419	8
LD7-235	1613	73	1568	45	1537	30
LD7-236	400	82	310	14	299	5
LD7-238	513	89	381	18	360	7
LD7-239	430	88	405	18	401	7
LD7-240	1867	58	1826	40	1793	29
LD7-241	1204	67	642	23	494	9
LD7-242	1040	69	520	20	410	7
LD7-243	2477	58	2431	48	2378	42
LD7-244	1848	61	1801	41	1762	29
LD7-245	812	80	702	27	669	12
LD7-246	1576	65	1381	38	1260	22
LD7-247	958	127	687	29	607	11
LD7-248	1613	72	1008	35	754	15
LD7-249	2392	59	2282	46	2165	36
LD7-250	714	317	360	42	308	7
LD7-251	1126	88	865	36	768	16
LD7-252	374	101	372	19	373	8
LD7-253	1038	164	344	22	251	5
LD7-254	451	87	409	19	403	8
LD7-255	1872	70	1744	46	1640	30
LD7-256	2540	168	498	37	174	5
LD7-257	870	170	467	29	389	7
LD7-258	867	47	992	22	1050	15
LD7-259	618	72	597	22	591	10
LD7-260	1410	207	1401	76	1395	33
LD7-261	1770	48	1790	34	1808	28
LD7-262	257	99	410	20	438	8
LD7-263	1696	45	1660	31	1632	24
LD7-264	102	82	210	10	220	4
LD7-265	772	65	705	23	684	12
LD7-266	123	90	241	12	254	5
LD7-267	1605	53	1652	35	1690	27
LD7-268	2516	42	2483	36	2444	34
LD7-269	430	126	113	8	99	2
LD7-270	325	66	406	14	421	7
LD7-271	51	87	189	10	200	4
LD7-272	1689	59	1716	40	1739	30
LD7-273	2126	108	1903	49	1706	29
LD7-274	2054	53	2137	40	2226	34
LD7-275	1465	59	1404	34	1366	22
LD7-276	429	92	474	22	484	9
LD7-277	1716	60	1692	40	1675	28
LD7-278	2358	54	2278	42	2193	34
LD7-279	229	178	205	19	203	5
LD7-280	267	91	407	19	433	8
LD7-281	1370	71	1004	34	846	15
LD7-282	-117	159	208	19	243	6
LD7-283	191	99	209	11	211	4
LD7-284	322	99	343	17	346	7
LD7-285	313	319	242	32	235	5
LD7-286	719	87	473	22	425	8
LD7-287	445	104	469	24	475	10
LD7-288	932	120	259	18	191	5
LD7-289	763	99	654	31	624	13
LD7-290	2009	127	1592	53	1297	25
LD7-291	1733	123	1229	44	962	19
LD7-292	274	116	273	16	273	6
LD7-293	237	113	265	16	269	6
LD7-294	2356	79	2223	58	2086	39
LD7-295	371	116	413	24	421	9
LD7-296	371	121	461	27	480	11
LD7-297	1811	95	1801	60	1797	38
LD7-298	519	166	298	25	271	7
LD7-299	390	127	414	26	419	10
LD7-300	1709	100	1401	56	1211	26

## Sheet: LD8
	207Pb/206Pb	1s	207Pb/235U	1s	206Pb/238U	1s
LD8-001	2245	603	798	155	383	25
LD8-002	2040	320	618	76	304	12
LD8-003	295	251	284	34	282	9
LD8-004	2470	85	2227	64	1970	44
LD8-005	796	147	483	35	419	11
LD8-006	1271	166	1084	53	993	20
LD8-007	843	352	481	59	408	13
LD8-008		241	230	26	253	8
LD8-009	739	376	304	43	250	8
LD8-010	2001	195	1917	87	1841	50
LD8-011	1484	234	468	43	288	8
LD8-012	1651	217	1368	81	1194	35
LD8-013	851	461	408	70	334	12
LD8-014	1303	119	483	31	329	8
LD8-015	1160	103	964	44	880	19
LD8-016	932	273	327	46	248	11
LD8-017	2282	88	1618	57	1158	26
LD8-018	622	395	278	42	239	7
LD8-019	2656	86	1580	58	903	22
LD8-020	692	404	422	80	375	21
LD8-021	349	341	405	54	415	12
LD8-022	560	237	312	36	280	10
LD8-023	1642	260	1551	101	1485	51
LD8-024	822	158	801	55	794	22
LD8-025	775	137	250	19	198	5
LD8-026	1927	103	1849	67	1783	42
LD8-027	108	302	298	52	323	14
LD8-028	672	521	289	65	244	8
LD8-029	746	186	479	43	426	13
LD8-030	2109	262	1546	109	1169	35
LD8-031	1050	149	988	62	962	27
LD8-032	2278	151	2358	118	2455	106
LD8-033	728	562	476	104	426	19
LD8-034	-194	437	52	21	76	6
LD8-035	1091	216	470	52	354	14
LD8-036		199	216	18	236	7
LD8-037	611	194	514	46	493	16
LD8-038	784	216	303	34	245	9
LD8-039	1619	278	1208	97	992	33
LD8-040	1646	192	1035	90	772	33
LD8-041	1982	136	1932	92	1891	62
LD8-042	860	194	703	62	657	23
LD8-043	733	205	489	48	439	15
LD8-044	839	169	530	44	462	14
LD8-045	1020	152	930	61	895	26
LD8-046	2067	146	515	46	238	9
LD8-047	328	313	283	45	279	13
LD8-048	1878	126	1888	82	1902	53
LD8-049		278	365	46	425	12
LD8-050	1825	129	1791	81	1768	50
LD8-051	643	307	469	67	436	20
LD8-052	591	243	541	60	531	21
LD8-053	909	260	316	43	243	11
LD8-054	932	193	530	51	443	16
LD8-055	1018	208	501	53	397	16
LD8-056	1203	372	1003	108	914	32
LD8-057	1054	442	1062	130	1066	37
LD8-058	1768	137	1851	87	1934	56
LD8-059	-230	276	244	49	303	15
LD8-060	686	184	432	40	388	13
LD8-061	1111	184	1208	87	1269	45
LD8-062	1310	662	731	157	556	29
LD8-063	1816	138	1884	89	1956	58
LD8-064	-333	234	222	34	287	12
LD8-065	283	202	275	27	275	8
LD8-066	113	87	221	11	232	4
LD8-067	558	78	637	24	659	12
LD8-068	1880	43	1847	32	1819	27
LD8-069	593	102	444	23	417	8
LD8-070	463	119	435	18	430	7
LD8-071	629	171	466	28	433	8
LD8-072	1537	82	1369	30	1264	19
LD8-073	1260	49	1237	28	1225	18
LD8-074	976	70	792	27	728	13
LD8-075	285	106	241	13	237	5
LD8-076	337	289	215	24	204	5
LD8-077	444	88	377	17	366	7
LD8-078	1918	75	1850	32	1789	25
LD8-079	2322	43	2286	36	2248	33
LD8-080	1476	115	963	35	754	13
LD8-081	1886	54	1779	38	1689	28
LD8-082	-26	130	208	15	232	5
LD8-083	1796	47	1551	31	1378	21
LD8-084	2754	44	2352	37	1918	30
LD8-085	813	60	861	25	880	14
LD8-086	785	74	633	24	592	10
LD8-087	832	67	874	27	891	15
LD8-088	627	323	468	53	437	11
LD8-089	1324	62	998	30	857	15
LD8-090	938	71	832	28	793	14
LD8-091	458	156	265	21	243	6
LD8-092	189	321	256	45	263	10
LD8-093	678	85	476	21	436	8
LD8-094	1845	64	1078	34	739	14
LD8-095	1572	58	1303	33	1145	19
LD8-096	1668	82	1590	50	1532	32
LD8-097	701	286	437	45	389	8
LD8-098	591	175	496	30	476	9
LD8-099	272	110	238	14	235	5
LD8-100	569	107	304	17	270	6
LD8-101	246	180	296	26	302	8
LD8-102	1074	83	962	36	913	17
LD8-103	440	117	432	24	431	9
LD8-104	1352	74	1318	40	1297	23
LD8-105	2546	62	2374	48	2178	37
LD8-106	1142	87	1150	42	1153	22
LD8-107	1349	369	912	105	742	19
LD8-108	1698	70	1597	43	1522	27
LD8-109	1252	405	840	106	693	20
LD8-110	1031	218	396	33	296	7
LD8-111	925	89	752	32	695	13
LD8-112	478	232	323	36	302	9
LD8-113	1220	140	1128	45	1081	21
LD8-114	683	98	732	33	748	15
LD8-115	762	96	658	30	628	13
LD8-116	2261	76	2155	55	2046	39
LD8-117	2520	78	2453	62	2372	51
LD8-118	2259	76	1648	50	1212	24
LD8-119	2196	87	1860	60	1574	36
LD8-120	2375	129	1889	60	1479	30
LD8-121	2464	76	2158	56	1851	34
LD8-122	667	127	355	24	309	7
LD8-123	1267	96	896	40	753	16
LD8-124	2020	107	1899	73	1791	48
LD8-125	728	265	244	25	197	5
LD8-126	884	110	807	40	779	17
LD8-127	788	192	501	34	440	10
LD8-128	474	353	374	49	358	10
LD8-129	213	132	399	25	433	9
LD8-130	545	118	532	30	530	11
LD8-131	1233	62	1137	31	1089	18
LD8-132	2155	50	2046	38	1942	30
LD8-133	2534	51	2440	43	2331	39
LD8-134	2499	67	2519	57	2546	58
LD8-135	382	103	420	21	428	8
LD8-136	1792	51	1759	35	1734	26
LD8-137	2388	47	1923	36	1524	23
LD8-138	241	122	288	18	294	6
LD8-139	145	150	246	19	257	6
LD8-140	1871	52	1786	36	1716	26
LD8-141	1245	112	1188	37	1157	19
LD8-142	950	93	646	30	563	11
LD8-143	2169	52	2151	39	2133	33
LD8-144	1483	140	1205	49	1056	19
LD8-145	539	301	291	33	261	7
LD8-146	386	370	292	45	281	8
LD8-147	2024	59	2044	43	2067	34
LD8-148	975	186	239	18	171	3
LD8-149	514	303	282	32	255	6
LD8-150	625	147	591	40	583	15
LD8-151	1891	58	1878	40	1867	30
LD8-152	348	188	206	15	194	4
LD8-153	761	95	721	32	709	14
LD8-154	1604	129	1512	50	1448	26
LD8-155	746	259	282	28	229	5
LD8-156	2414	55	2374	43	2331	35
LD8-157	481	183	347	31	328	9
LD8-158	367	143	404	28	410	10
LD8-159	233	118	245	15	246	5
LD8-160	408	262	361	34	354	8
LD8-161	1749	65	1672	42	1612	27
LD8-162	1915	77	1777	52	1664	34
LD8-163	948	82	942	34	940	17
LD8-164	2232	65	2286	49	2349	40
LD8-165	1389	79	1124	39	993	19
LD8-166	1412	74	1149	37	1016	19
LD8-167	324	117	417	24	434	9
LD8-168	593	187	440	29	411	9
LD8-169	597	103	436	23	407	8
LD8-170	1734	75	1531	46	1390	26
LD8-171	295	164	343	27	351	9
LD8-172	202	379	23	5	20.9	0.9
LD8-173	2279	70	2277	52	2278	41
LD8-174	1682	77	1215	41	971	19
LD8-175	1577	79	1482	46	1418	27
LD8-176	511	101	451	23	440	9
LD8-177	566	127	456	28	435	10
LD8-178	791	286	474	48	411	12
LD8-179	710	201	334	34	283	9
LD8-180	438	319	265	32	246	6
LD8-181	579	129	329	22	295	7
LD8-182	348	153	243	19	233	6
LD8-183	1912	83	1832	55	1766	35
LD8-184	694	366	410	55	362	9
LD8-185	1325	114	1020	51	885	22
LD8-186	586	127	460	29	435	10
LD8-187	1461	96	1212	49	1078	24
LD8-188	1043	100	974	43	945	20
LD8-189	2104	86	1756	57	1481	31
LD8-190	211	149	246	19	250	6
LD8-191	885	185	721	43	670	15
LD8-192	630	120	427	26	391	9
LD8-193	1951	51	1828	36	1722	27
LD8-194	1203	274	969	81	869	22
LD8-195	875	167	527	31	451	9
LD8-196	1166	80	884	33	775	15
LD8-197	1767	117	1500	46	1319	22
LD8-198	1728	51	1516	32	1369	21
LD8-199	1751	111	1342	42	1101	18
LD8-200	2060	71	1880	31	1721	24
LD8-201	1017	95	884	25	831	13
LD8-202	909	73	770	27	723	12
LD8-203	628	255	471	42	440	10
LD8-204	2555	41	1995	33	1500	22
LD8-205	790	94	501	24	441	9
LD8-206	1107	75	1019	34	978	18
LD8-207	640	108	472	25	438	9
LD8-208	118	162	226	19	237	6
LD8-209	559	145	486	24	471	8
LD8-210	891	153	724	36	671	13
LD8-211	1090	179	420	40	309	10
LD8-212	2668	52	2536	45	2376	43
LD8-213	955	83	807	32	755	14
LD8-214	690	173	407	35	359	10
LD8-215	2487	85	2297	41	2090	34
LD8-216	1837	98	1677	41	1552	25
LD8-217	411	82	305	14	291	5
LD8-218	996	264	532	50	430	12
LD8-219	499	169	297	25	272	7
LD8-220	815	91	451	22	384	8
LD8-221	2019	93	1936	41	1860	30
LD8-222	1088	66	981	30	935	16
LD8-223	1874	53	1617	35	1429	23
LD8-224	577	111	465	26	443	9
LD8-225	1055	78	927	33	875	16
LD8-226	1712	83	729	33	452	10
LD8-227	2089	102	1674	44	1363	24
LD8-228	55	177	356	31	405	11
LD8-229	850	198	302	23	236	5
LD8-230	2368	95	2242	46	2106	35
LD8-231	884	133	668	42	606	15
LD8-232	881	276	312	33	241	6
LD8-233	607	188	421	28	388	8
LD8-234	432	239	374	32	365	9
LD8-235	2595	61	2416	50	2212	41
LD8-236	1790	63	1818	43	1845	31
LD8-237	462	202	476	33	479	10
LD8-238	1558	67	1529	41	1510	27
LD8-239	617	107	462	25	432	9
LD8-240	11	108	357	21	413	9
LD8-241	1304	74	1215	39	1167	22
LD8-242	-12	275	279	45	315	11
LD8-243	913	136	860	35	839	16
LD8-244	1807	144	1636	60	1506	31
LD8-245		312	195	32	212	6
LD8-246	952	155	598	45	509	15
LD8-247	1802	72	1597	46	1448	28
LD8-248	579	153	448	34	424	12
LD8-249	1934	83	1939	58	1946	43
LD8-250	668	148	487	35	450	12
LD8-251	2064	74	1680	49	1392	28
LD8-252	1135	151	982	65	916	29
LD8-253	2271	71	1890	51	1565	31
LD8-254	2605	73	2592	61	2578	56
LD8-255	1183	92	692	33	551	12
LD8-257	2610	72	2492	36	2350	33
LD8-258	487	132	448	28	440	10
LD8-259	579	190	349	33	316	9
LD8-260	901	60	850	25	831	13
LD8-261	827	64	936	27	984	16
LD8-262	375	159	286	22	275	7
LD8-263	1277	57	1228	31	1201	19
LD8-264	2006	49	2004	37	2003	31
LD8-265	441	365	285	42	266	8
LD8-266	909	71	706	25	645	11
LD8-267	771	83	591	25	546	10
LD8-268	2368	46	2336	37	2304	33
LD8-269	883	338	539	81	462	21
LD8-270	1934	53	1981	39	2031	32
LD8-271	1867	53	1817	37	1777	28
LD8-272	882	94	878	37	879	18
LD8-273	561	163	575	43	580	16
LD8-274	2583	52	2505	43	2416	38
LD8-275	966	76	1008	34	1031	19
LD8-276	721	82	681	27	671	13
LD8-277	134	375	83	17	82	3
LD8-278	672	76	728	26	749	13
LD8-279	681	103	846	38	914	19
LD8-280	535	139	433	29	416	10
LD8-281	355	343	283	40	274	7
LD8-282	880	83	818	32	799	15
LD8-283	1081	127	972	36	925	17
LD8-284	932	85	821	33	785	15
LD8-285	547	97	397	20	374	8
LD8-286	1119	86	1068	40	1050	21
LD8-287	1561	89	1525	53	1508	32
LD8-288	792	94	695	31	669	14
LD8-289	2035	77	1868	52	1733	33
LD8-290	2437	77	2379	59	2327	45
LD8-291	209	271	222	24	224	5
LD8-292	1553	89	1535	52	1532	32
LD8-293	2954	121	2837	65	2676	52
LD8-294	751	114	689	37	675	16
LD8-295	298	156	414	31	439	11
LD8-296	640	128	469	30	439	11
LD8-297	1290	176	1159	58	1091	25
LD8-298	1919	95	1866	63	1833	40
LD8-299	599	132	389	26	357	9
LD8-300	1812	178	1332	68	1055	25

## Sheet: LD9
	207Pb/206Pb	1s	207Pb/235U	1s	206Pb/238U	1s
LD9-101	1878	63	1812	42	1759	29
LD9-102	823	99	320	18	256	5
LD9-103	490	148	457	32	451	11
LD9-104	367	110	243	14	231	5
LD9-105	344	181	455	37	478	12
LD9-106	2464	66	2415	52	2361	42
LD9-107	198	176	425	34	469	11
LD9-108	1871	93	1735	61	1627	38
LD9-109	1263	81	1113	39	1039	20
LD9-110	1049	88	936	37	890	17
LD9-111	2605	104	2170	51	1740	31
LD9-112	1544	92	1450	52	1389	30
LD9-113	1072	144	1006	42	976	19
LD9-114	668	118	504	29	470	11
LD9-115	1887	120	1726	51	1596	30
LD9-116	552	126	454	28	436	10
LD9-117	1827	85	1743	54	1677	33
LD9-118	928	114	806	41	763	17
LD9-119	1463	206	1468	79	1471	32
LD9-120	368	203	311	31	304	9
LD9-121	1806	92	1781	59	1762	37
LD9-122	2606	82	2576	64	2542	52
LD9-123	859	421	712	96	666	18
LD9-124	2434	124	2217	61	1990	39
LD9-125	335	519	776	153	938	42
LD9-126	687	147	516	37	479	13
LD9-127	2562	86	2519	67	2469	52
LD9-128	346	153	254	20	245	6
LD9-129	456	152	270	21	250	7
LD9-130	860	131	484	32	410	10
LD9-131	56	230	296	36	328	11
LD9-132	940	149	860	56	832	23
LD9-133	2855	109	2425	56	1946	39
LD9-134	1900	80	1465	49	1188	25
LD9-135	465	208	237	25	215	7
LD9-136	392	179	446	37	458	13
LD9-137	2148	82	1988	58	1845	40
LD9-138	1303	91	541	27	380	8
LD9-139	1760	102	1658	64	1586	40
LD9-140	3565	67	376	26	66	3
LD9-141	1260	756	896	204	756	43
LD9-142	1199	108	403	25	280	7
LD9-143	612	146	461	33	433	11
LD9-144	997	244	434	54	338	15
LD9-145	611	150	370	28	334	9
LD9-146	246	193	245	24	246	7
LD9-147	449	230	294	34	277	9
LD9-148	174	178	230	21	237	7
LD9-149	343	232	295	34	291	10
LD9-150	552	234	273	32	243	9
LD9-151	794	208	405	42	343	12
LD9-152	625	160	452	35	422	12
LD9-153	544	207	727	63	793	26
LD9-154	2546	87	2505	69	2471	57
LD9-155	451	206	473	45	481	16
LD9-156	2044	93	2103	66	2180	49
LD9-157	254	178	284	26	290	8
LD9-158	2027	109	1984	76	1957	54
LD9-159	142	156	385	30	430	12
LD9-160	1000	207	816	74	756	28
LD9-161	364	169	446	36	466	13
LD9-162	2251	2701	550	424	232	45
LD9-163	1448	138	1498	78	1546	46
LD9-164	443	154	477	35	489	14
LD9-165	11	247	425	57	510	20
LD9-166	63	278	439	68	519	24
LD9-167	-74	210	178	25	203	8
LD9-168	2517	99	2440	76	2368	58
LD9-169	1217	130	984	57	891	25
LD9-170	201	267	275	38	287	12
LD9-171	2164	114	2059	80	1974	55
LD9-172	259	523	330	82	340	17
LD9-173	2699	102	2442	79	2165	55
LD9-174	1882	119	1884	78	1903	51
LD9-175	414	175	430	36	437	13
LD9-176	863	154	763	53	737	22
LD9-177	977	151	927	60	916	27
LD9-178	1559	140	1591	82	1631	50
LD9-179	1232	147	1249	73	1272	38
LD9-180	357	196	220	23	210	7
LD9-181	286	286	246	36	244	10
LD9-182	840	187	473	45	405	14
LD9-183	961	343	327	58	248	14
LD9-184	486	168	426	35	420	13
LD9-185	309	194	403	38	424	14
LD9-186	-126	188	370	43	468	17
LD9-187	-37	237	355	52	429	19
LD9-188	1509	161	975	72	764	27
LD9-189	243	183	372	34	398	13
LD9-190	2453	125	2193	90	1946	57
LD9-191	1675	153	1640	92	1631	55
LD9-192	-269	389	40	15	62	5
LD9-193	929	489	908	134	899	38
LD9-194	2281	168	2120	129	1945	102
LD9-195	-23	214	414	52	500	19
LD9-196	1594	187	1701	115	1778	77
LD9-197	221	277	363	51	383	16
LD9-198	854	511	467	89	393	18
LD9-199	-216	248	184	43	286	15
LD9-200	853	518	144	32	105	4
LD9-201	187	467	499	104	570	22
LD9-202	782	225	500	54	441	17
LD9-203	1114	208	815	77	710	29
LD9-204	710	179	874	65	942	30
LD9-205	192	217	253	28	260	9
LD9-206	484	361	187	37	165	9
LD9-207	-2	324	280	59	315	18
LD9-208	934	713	518	138	429	22
LD9-209	-253	252	156	38	249	13
LD9-210	904	427	271	45	203	9
LD9-211	814	240	307	39	247	10
LD9-212	1545	259	1074	83	858	29
LD9-213	1261	342	1233	113	1218	39
LD9-214	249	286	336	50	353	16
LD9-215	306	297	246	38	242	11
LD9-216	437	331	493	74	511	25
LD9-217	1391	163	1041	74	897	31
LD9-218	1663	868	471	141	265	14
LD9-219	352	267	300	40	299	12
LD9-220	1892	145	1797	91	1745	54
LD9-221	721	204	447	45	403	15
LD9-222	1736	169	1461	96	1303	48
LD9-223	801	229	297	36	241	10
LD9-224	2383	141	2272	101	2193	68
LD9-225	426	509	460	99	467	20
LD9-226	1230	181	1003	78	925	33
LD9-227	2761	148	2664	114	2599	85
LD9-228	2149	164	2009	111	1921	69
LD9-229	2054	173	2079	117	2156	80
LD9-230	1312	214	524	59	373	16
LD9-231	610	498	471	92	443	19
LD9-232	2108	165	1810	105	1606	55
LD9-233	693	521	309	85	270	21
LD9-234	2003	178	1891	113	1849	65
LD9-235	1866	214	1761	132	1731	78
LD9-236	969	271	586	75	511	24
LD9-237	559	271	514	64	524	23
LD9-238	753	589	334	82	277	13
LD9-239	2209	184	1957	120	1791	67
LD9-240		1878	116	201	122	22
LD9-241	1990	208	1676	125	1497	62
LD9-242	1119	246	1023	102	1022	44
LD9-243	1312	311	608	92	457	26
LD9-244	1379	782	298	89	179	10
LD9-245	510	421	294	67	280	18
LD9-246		450	326	76	374	19
LD9-247	1302	255	927	102	816	38
LD9-248	-53	284	196	40	233	13
LD9-249	631	348	313	54	287	15
LD9-250	2729	215	2543	157	2431	103
LD9-251	1465	1404	350	198	206	17
LD9-252	2821	218	2524	160	2283	99
LD9-253	932	488	455	80	366	18
LD9-254	97	388	285	70	328	22
LD9-255	1395	295	285	48	180	10
LD9-256	2790	231	2485	170	2246	108
LD9-257	573	139	273	20	240	6
LD9-258	259	322	407	53	434	11
LD9-259	1215	188	1034	58	950	22
LD9-260	1278	263	404	56	269	12
LD9-261	686	160	542	40	510	13
LD9-262	2088	97	1954	67	1835	44
LD9-263	823	248	270	35	212	8
LD9-264	2267	82	2110	59	1958	39
LD9-265	1396	117	1296	60	1239	30
LD9-266	1074	125	605	38	489	12
LD9-267	1358	113	1161	54	1062	25
LD9-268	1255	619	550	118	396	26
LD9-269	2715	87	2635	71	2539	59
LD9-270	1083	280	357	52	257	12
LD9-271	327	219	454	45	481	14
LD9-272	605	238	591	61	589	21
LD9-273	855	333	470	55	395	13
LD9-274	2118	123	1315	71	882	27
LD9-275	1989	97	2029	64	2075	42
LD9-276	2445	94	2421	69	2400	50
LD9-277	655	464	682	108	690	28
LD9-278	665	153	495	36	461	12
LD9-279	2022	106	2073	72	2131	48
LD9-280	1256	152	1289	75	1314	38
LD9-281	717	229	492	53	446	16
LD9-282	476	206	261	27	239	8
LD9-283	658	239	509	56	478	18
LD9-284	1992	129	2028	86	2069	58
LD9-285	2247	123	2183	87	2122	59
LD9-286	2495	162	2306	80	2099	51
LD9-287	2591	112	2348	83	2087	53
LD9-288	948	258	631	74	548	23
LD9-289	2724	124	2625	98	2508	76
LD9-290	600	414	312	50	275	11
LD9-291	4490	103	2542	96	833	31
LD9-292	1052	167	1158	75	1220	37
LD9-293	1010	205	851	75	795	28
LD9-294	1057	221	596	63	484	19
LD9-295	1830	146	1763	90	1715	51
LD9-296	1959	146	2115	97	2289	67
LD9-297	739	341	533	83	489	25
LD9-298	302	239	437	49	465	17
LD9-299	754	476	613	101	575	26
LD9-300	809	301	791	99	788	38
LD9-001	1649	80	1629	51	1613	36
LD9-002	434	87	436	19	436	8
LD9-003	274	91	442	20	474	9
LD9-004	428	85	446	19	450	8
LD9-005	509	123	298	19	271	6
LD9-006	850	328	821	81	810	26
LD9-007	1709	58	1865	41	2008	35
LD9-008	2500	37	2553	33	2620	36
LD9-009	996	121	910	48	874	22
LD9-010	52	210	213	23	227	7
LD9-011	1829	43	1823	31	1818	26
LD9-012	425	311	422	47	422	12
LD9-013	454	175	333	29	316	9
LD9-014	622	170	207	19	173	5
LD9-015	1973	60	2094	45	2219	41
LD9-016	1887	44	1399	29	1101	17
LD9-017	1867	47	1882	34	1896	28
LD9-018	2147	44	1961	34	1790	27
LD9-019	172	152	273	21	284	7
LD9-020	482	159	329	26	308	8
LD9-021	1803	77	1868	54	1926	42
LD9-022	1846	62	1808	43	1774	33
LD9-023	475	116	352	21	334	7
LD9-024	226	130	411	25	444	10
LD9-025	944	84	790	31	736	14
LD9-026	634	200	328	33	286	9
LD9-027	1449	71	1601	43	1720	31
LD9-028	1335	83	1451	47	1532	30
LD9-029	95	177	427	36	491	13
LD9-030	691	173	549	32	515	10
LD9-031	237	275	264	36	267	9
LD9-032	847	83	932	34	968	18
LD9-033	580	94	458	22	434	8
LD9-034	827	243	482	41	412	11
LD9-035	590	187	457	40	431	12
LD9-036	1754	71	1757	47	1760	33
LD9-037	299	157	238	19	232	6
LD9-038	884	388	137	22	98	2
LD9-039	376	118	512	28	543	11
LD9-040	498	95	300	15	276	5
LD9-041	-117	204	234	31	275	8
LD9-042	1904	69	1893	47	1884	33
LD9-043	783	149	477	35	416	11
LD9-044	680	358	438	71	393	18
LD9-045	2309	68	2273	51	2235	40
LD9-046	93	140	203	15	213	5
LD9-047	71	124	223	15	238	5
LD9-048	1957	71	1989	49	2023	35
LD9-049	1307	96	1187	47	1124	23
LD9-050	1921	95	1793	63	1688	40
LD9-051	391	210	176	14	161	4
LD9-052	633	293	366	39	325	8
LD9-053	577	169	278	24	244	6
LD9-054	571	130	487	30	470	11
LD9-055	-44	177	252	25	289	8
LD9-056	681	127	471	29	429	10
LD9-057	652	129	494	31	462	11
LD9-058	1035	114	557	32	448	10
LD9-059	1691	90	1616	54	1562	31
LD9-060	277	130	264	17	263	6
LD9-061	1167	106	839	41	722	16
LD9-062	1102	244	1045	74	1017	24
LD9-063	555	124	471	28	455	10
LD9-064	613	192	298	29	260	8
LD9-065	301	102	273	14	270	5
LD9-066	2536	40	2515	34	2494	35
LD9-067	252	157	258	20	259	6
LD9-068	1847	60	1781	42	1730	31
LD9-069	121	186	297	27	320	8
LD9-070	71	159	218	18	232	5
LD9-071	804	237	317	29	255	5
LD9-072	523	86	529	22	532	10
LD9-073	2458	41	2345	35	2221	31
LD9-074	2473	82	2403	40	2322	36
LD9-075	1849	49	1844	35	1844	28
LD9-076	1801	48	1606	32	1464	22
LD9-077	426	116	439	24	442	9
LD9-078	648	119	462	27	427	9
LD9-079	1823	54	1808	38	1800	29
LD9-080	451	124	264	17	244	5
LD9-081	776	86	695	29	671	13
LD9-082	307	126	237	15	230	5
LD9-083	1910	49	1867	35	1832	27
LD9-084	423	138	251	18	234	5
LD9-085	450	274	260	27	239	6
LD9-086	474	199	449	31	444	9
LD9-087	791	76	778	28	775	14
LD9-088	407	176	260	23	244	6
LD9-089	373	119	244	15	232	5
LD9-090	342	138	432	28	450	10
LD9-091	1868	62	1793	42	1732	30
LD9-092	2147	113	2091	53	2035	36
LD9-093	759	105	517	27	465	10
LD9-094	1130	87	508	27	382	11
LD9-095	966	91	557	26	464	9
LD9-096	822	92	816	34	815	16
LD9-097	631	172	278	25	238	7
LD9-098	1596	116	1170	59	955	25
LD9-100	667	163	678	35	682	13

[truncated: 1 more sheets: JX-0]
